1           Disrupting the plastid-hosted iron-sulfur cluster biogenesis pathway in  
2           *Toxoplasma gondii* has pleiotropic effects irreversibly impacting parasite  
3           viability

4 Eléa A. Renaud<sup>1‡</sup>, Sarah Pamukcu<sup>1‡</sup>, Aude Cerutti<sup>1</sup>, Laurence Berry<sup>1</sup>, Catherine Lemaire-Vieille<sup>2</sup>,  
5 Yoshiki Yamaryo-Botté<sup>2</sup>, Cyrille Y. Botté<sup>2</sup>, and Sébastien Besteiro<sup>1\*</sup>

6 <sup>1</sup> LPHI, Univ Montpellier, CNRS, UMR5235, Montpellier, France

7 <sup>2</sup> ApicoLipid Team, Centre National de la Recherche Scientifique, Institute for Advanced Biosciences,  
8 Institut National de la Santé et de la Recherche Médicale, UMR5309, U1209, Université Grenoble  
9 Alpes, Grenoble, France

10 <sup>‡</sup> These authors contributed equally to this work; author order was determined randomly

11 <sup>\*</sup> For correspondence: Sébastien Besteiro, [sebastien.besteiro@inserm.fr](mailto:sebastien.besteiro@inserm.fr)

12

13 *Running title:* Importance of the *Toxoplasma* SUF iron-sulfur cluster pathway

14

15 *Keywords:* *Toxoplasma gondii*, iron metabolism, iron-sulfur protein, parasite metabolism, apicoplast,  
16 lipid

17

18 *Abstract*

19 Like many other apicomplexan parasites, *Toxoplasma gondii* contains a plastid harbouring key  
20 metabolic pathways, including the SUF pathway that is involved in the biosynthesis of iron-sulfur  
21 clusters. These cofactors are key for a variety of proteins involved in important metabolic reactions,  
22 potentially including plastidic pathways for the synthesis of isoprenoid and fatty acids. It was shown  
23 previously that impairing the NFS2 cysteine desulfurase, involved in the first step of the SUF  
24 pathway, leads to an irreversible killing of intracellular parasites. However, the metabolic impact of  
25 disrupting the pathway remained unexplored. We have generated another mutant of the pathway,  
26 deficient for the SUFC ATPase, and we have investigated in details the phenotypic consequences of  
27 TgNFS2 and TgSUFC depletion on parasite homeostasis. Our analysis confirms that *Toxoplasma* SUF  
28 mutants are severely and irreversibly impacted in growth: cell division and membrane homeostasis  
29 are particularly affected. Lipidomic analysis suggests a defect in apicoplast-generated fatty acids,  
30 along with a simultaneous increase in scavenging of host-derived lipids. However, addition of  
31 exogenous lipids did not allow full restauration of growth, suggesting other more important cellular  
32 functions were impacted in addition to fatty acid synthesis. For instance, we have shown that the  
33 SUF pathway is also key for generating isoprenoid-derived precursors necessary for the proper  
34 targeting of GPI-anchored proteins as well as for the parasite gliding motility. Thus, plastid-generated  
35 iron-sulfur clusters support the functions of proteins involved in several vital downstream cellular  
36 pathways, which implies the SUF machinery may be explored for discovering new potential anti-  
37 *Toxoplasma* targets.

38

39

40

41 *Introduction*

42 Apicomplexan parasites are some of the most prevalent and morbidity-causing pathogens  
43 worldwide. Noticeably, they comprise *Plasmodium* species that can naturally infect humans and  
44 cause the deadly malaria in tropical and subtropical areas of the world (1). Although less lethal,  
45 another apicomplexan parasite called *Toxoplasma gondii* can cause serious illness in animals,  
46 including humans, and has a widespread host range and geographical distribution (2). These protists  
47 are obligate intracellular parasites that rely to a large extent on their host cells for nutrient  
48 acquisition and for protection from the immune system. Through their evolutionary history,  
49 *Plasmodium* and *Toxoplasma* have inherited a plastid from a secondary endosymbiosis event  
50 involving the engulfment of a red alga whose photosynthetic capability previously originated from  
51 the acquisition of a cyanobacterium (3). Although the ability to perform photosynthesis has been lost  
52 during evolution when the ancestors of Apicomplexa became parasitic (4), the plastid has retained  
53 critical metabolic functions. For instance it hosts pathways for the synthesis of heme (together with  
54 the mitochondrion), fatty acids (via a prokaryotic FASII pathway), isoprenoid precursors (through the  
55 so-called non-mevalonate or 1-deoxy-D-xylulose 5-phosphate –DOXP- pathway), and iron-sulfur (Fe-  
56 S) clusters (5, 6). Because of its origin and its metabolic importance, the apicoplast is particularly  
57 attractive to look for potential drug targets (7).

58 As some of the earliest catalytic cofactors on earth (8), Fe-S clusters are found in all kingdoms of life,  
59 associated with proteins involved in a number of key cellular functions like the synthesis of  
60 metabolites, the replication and repair of DNA, the biogenesis of ribosomes and the modification of  
61 tRNAs (9). The biosynthesis of Fe-S clusters necessitates a complex machinery for assembling ferrous  
62 ( $\text{Fe}^{2+}$ ) or ferric ( $\text{Fe}^{3+}$ ) iron and sulfide ( $\text{S}^{2-}$ ) ions, and delivering the resulting Fe-S cluster to target  
63 client proteins (10). In eukaryotes Fe-S proteins are present in various subcellular compartments like  
64 the cytosol and the nucleus, but also organelles of endosymbiotic origin like mitochondria or plastids,  
65 and thus require compartment-specific biogenesis systems. The three main eukaryotic Fe-S synthesis  
66 pathways comprise the ISC (iron-sulfur cluster) machinery, hosted by the mitochondrion, the  
67 cytosolic Fe-S protein assembly (CIA) machinery, important not only for the generation of cytosolic,  
68 but also of nuclear Fe-S proteins, and the SUF (sulfur formation) pathway that is found in plastids (9).

69 Like in plants and algae, apicoplast-containing apicomplexan parasites seem to express the  
70 machinery corresponding to the three eukaryotic pathways. For instance, recent investigations in *T.*  
71 *gondii* have shown that the CIA, ISC and SUF pathways are all essential for parasite fitness (11, 12).  
72 From a biochemical point of view, mitochondrial and plastidic Fe-S cluster biosynthesis pathways  
73 follow a similar general pattern: cysteine desulfurases produce sulfur from L-cysteine, then scaffold  
74 proteins provide a molecular platform allowing assembly of iron and sulfur into a cluster, and finally  
75 carrier proteins deliver the cluster to target apoproteins. Importantly, targeting the *T. gondii*  
76 mitochondrial ISC pathway through disruption of scaffold protein ISU1 was shown to lead to a  
77 reversible growth arrest and to trigger differentiation into a stress-resistant form; while on the other  
78 hand, targeting the plastidic SUF pathway by inactivating NFS2 function led to an irreversible lethal  
79 phenotype (12). Like for many apicoplast-hosted pathways, enzymes belonging to the SUF machinery  
80 are essentially absent from the mammalian host and as such they may be seen as good potential  
81 drug targets. This has sparked considerable interest for the SUF pathway in *Plasmodium*, which has  
82 been shown to be important for the viability of several developmental stages of the parasite (13–17).

83 To better understand the contribution of the SUF pathway to *T. gondii* viability, we have generated a  
84 conditional mutant for the scaffold protein TgSUF1 and conducted a thorough phenotypic

85 characterization of this mutant, together with the TgNFS2 mutant we have previously generated (12).  
86 Our results confirm that inactivating the plastid-hosted SUF pathway in *T. gondii* leads to irreversible  
87 and marked effects on membrane homeostasis, impacting the division process and parasite viability.  
88 We show that these effects are likely due to impairment in the function of several key plastidic Fe-S  
89 proteins, which have pleiotropic downstream metabolic consequences for the parasite.

90

## 91 *Results*

### 92 **A Toxoplasma SUFC homolog in the apicoplast**

93 Searching for homologs of the plant SUF system in the ToxoDB.org database, we have previously  
94 shown an overall good conservation for the plastidic Fe-S cluster synthesis pathway (12). Among the  
95 candidates for members of the SUF machinery, we have identified a potential *T. gondii* homolog of  
96 SUFC, member of a Fe-S cluster scaffold complex comprising SUFC, SUFB and SUFD (Fig. 1A). This  
97 complex is also present in prokaryotes, where it was first characterized (18): it was shown that  
98 bacterial SufC is an ATP-binding cassette (ABC)-like ATPase component essential for proper Fe-S  
99 cluster assembly (19). Alignment of the amino acid sequences of the *T. gondii* SUFC candidate (entry  
100 TGGT1\_225800 in the ToxoDB.org database (20)) and its *Escherichia coli* counterpart showed a good  
101 overall conservation (56% of identity), particularly in the motifs that are characteristic of ABC  
102 ATPases (Fig. 1B). The *T. gondii* protein presents a N-terminal extension when compared with *E. coli*  
103 SufC, which may contain a transit peptide for targeting to the apicoplast. Accordingly, it was  
104 predicted with high probability to be a plastid-localized protein by the DeepLoc 1.0  
105 (<http://www.cbs.dtu.dk/services/DeepLoc-1.0/>) algorithm, although the exact position of the N-  
106 terminal transit peptide sequence could not be defined. Data from global mapping of *T. gondii*  
107 proteins subcellular location by hyperLOPIT spatial proteomics (21) also suggested an apicoplast  
108 localization for TGGT1\_225800. To assess whether this protein is a real functional homolog, we first  
109 performed complementation assays of an *E. coli* SufC mutant, for which growth is slowed, especially  
110 when limiting iron availability with a specific chelator (22). We could show that expressing the  
111 predicted functional domain of TGGT1\_225800 restored bacterial growth (Fig. 1C), even in the  
112 presence of the iron chelator, confirming this protein (hereafter named TgSUFC) is functional.

113 In order to detect TgSUFC expression and assess its sub-cellular localization in the tachyzoite stage  
114 (the fast-replicating stage associated with acute toxoplasmosis (2)), we epitope-tagged the native  
115 protein. This was performed by inserting a sequence coding for a C-terminal triple hemagglutinin  
116 (HA) epitope tag at the endogenous *TgSUFC* locus by homologous recombination (Figure S1). It was  
117 achieved in the TATI  $\Delta$ Ku80 cell line, favoring homologous recombination and allowing  
118 transactivation of a Tet operator-modified promoter that we subsequently used for generating a  
119 conditional mutant in this background (23–25). Immunoblot analysis with an anti-HA antibody  
120 revealed two products, likely corresponding to the immature and mature forms (resulting from the  
121 cleavage of the transit peptide upon import into the organelle) of TgSUFC (Fig. 2A).

122 Immunofluorescence assay (IFA) with the anti-HA antibody and co-staining with an apicoplast marker  
123 confirmed that TgSUFC localizes to this organelle in *T. gondii* tachyzoites (Fig. 2B).

124

### 125 **Depletion of TgSUFC blocks parasite growth**

126 Next, we generated a conditional TgSUFC mutant cell line in the TgSUFC-HA-expressing TATI  $\Delta$ Ku80  
127 background. Replacement of the endogenous promoter by an inducible-Tet07SAG4 promoter was

128 achieved through a single homologous recombination at the locus of interest, yielding the cKD  
129 TgSUFC-HA cell line (Fig. S2). In this cell line, the addition of anhydrotetracycline (ATc) can repress  
130 transcription through a Tet-Off system (26). Initial phenotypic characterization was performed on  
131 two independent clones, which were found to behave similarly and thus only one was analysed  
132 further. It should be noted that the promoter replacement resulted in a slightly higher expression of  
133 TgSUFC, but did not change the maturation profile of the protein (Fig. 2A). Down-regulation of  
134 TgSUFC was assessed by growing the parasites in the presence of ATc. Immunoblot and IFA analyses  
135 showed a decrease of TgSUFC to almost undetectable levels after as early as one day of ATc  
136 treatment (Fig. 2A and B). We also generated a complemented cell line constitutively expressing an  
137 additional TY-tagged (27) copy of TgSUFC from the *uracil phosphoribosyltransferase* (*UPRT*) locus,  
138 driven by a *tubulin* promoter (Fig. S3). This cell line, named cKD TgSUFC-HA comp, was found by  
139 immunoblot (Fig. 2C) and IFA (Fig. 2D), to be stably expressing TgSUFC while the HA-tagged copy was  
140 down-regulated in the presence of ATc.

141 We first evaluated the consequences of TgSUFC depletion on parasite fitness *in vitro* by performing a  
142 plaque assay, which determines the capacity of the mutant and complemented parasites to produce  
143 lysis plaques on a host cells monolayer in absence or continuous presence of ATc for 7 days (Fig. 3).  
144 Depletion of TgSUFC prevented plaque formation, which was restored in the complemented cell lines  
145 (Fig. 3A and B). Our previous analysis of another SUF pathway mutant (TgNFS2, (12)) suggested that  
146 the impact on the pathway leads to irreversible death of the parasites, so we sought to verify this by  
147 removing the ATc after 7 days of incubation and monitoring plaque formation. We confirmed that  
148 depleting TgSUFC was irreversibly impacting parasite viability, as ATc removal did not lead to the  
149 appearance of plaques (Fig. 3C). We next assessed whether this defect in the lytic cycle is due to a  
150 replication problem. Mutant and control cell lines were preincubated in absence or presence of ATc  
151 for 48 hours and released mechanically, before infecting new host cells and were then grown for an  
152 additional 24 hours in ATc prior to parasite counting. We noted that the incubation with ATc led to  
153 an accumulation of vacuoles with fewer TgSUFC mutant parasites, but that it was not the case in the  
154 complemented cell lines (Fig. 3D). Overall, our data show that depleting TgSUFC leads to an  
155 irreversible impact on parasite growth, as previously described for other SUF mutant TgNFS2 (12).

156

### 157 **SUF pathway mutants display important membrane defects during cell division**

158 *T. gondii* tachyzoites divide by a process called endodyogeny, whereby two daughter cells will  
159 assemble inside a mother cell (28). Among the structures which are essential as a scaffold for  
160 daughter cell formation is the inner membrane complex (IMC), a system of flattened vesicles  
161 underlying the plasma membrane and is supported by a cytoskeletal network. The IMC also supports  
162 anchorage for the glideosome, the protein complex powering parasite motility (29). As for several  
163 other cellular structures, there is a combination of *de novo* assembly and recycling of maternal  
164 material during IMC formation in daughter cells (30). To get more precise insights into the impact of  
165 the impairment of the SUF pathway on parasite division, we incubated the TgNFS2 and TgSUFC  
166 mutant parasites with ATc for up to 2 days and stained them for IMC protein IMC3 to detect growing  
167 daughter cells (Fig. 4A). IMC3 is an early marker of daughter cell budding (31), which is usually  
168 synchronized within the same vacuole. However, after two days of ATc treatment an increasing  
169 portion of the vacuoles showed a lack of synchronicity for daughter cell budding for both mutant cell  
170 lines, although the effect was more pronounced for the TgSUFC mutant (Fig. 4A and B).

171 Then, we used electron microscopy to get a subcellular view of the consequences of TgNFS2 and  
172 TgSUFC depletion on the cell division process. Strikingly, in parasites grown in the continuous

173 presence of ATc for three days, we observed cytokinesis completion defects. As budding daughter  
174 cells emerge, they normally incorporate plasma membrane material that is partly recycled from the  
175 mother, leaving only a basal residual body. Here, in both TgNFS2 and TgSUFC mutant cell lines  
176 daughter cells remained tethered through patches of plasma membrane (Fig. 4C). Hence, this  
177 highlighted an early and important defect in plasma membrane biogenesis and/or recycling during  
178 daughter cell budding. We previously observed major cell division defects after long term (five days  
179 or more) continuous incubation of cKD TgNFS2-HA parasites with ATc (12). When assessing the cKD  
180 TgSUFC-HA parasites in the same conditions, co-staining with apicoplast and IMC markers revealed  
181 similar defects, including organelle segregation problems and an abnormal membranous structures  
182 (Fig. 4D).

183

#### 184 **Depletion of TgSUFC has an impact on the apicoplast**

185 Computational prediction of the Fe-S proteome combined with hyperLOPIT localization data suggests  
186 there is a limited number of apicoplast proteins potentially containing Fe-S clusters (12). However,  
187 these candidates are supposedly very important for the parasite. They include: IspG and IspH, two  
188 oxidoreductases involved in isoprenoid synthesis (32); LipA, a lipoyl synthase important for the  
189 function of the pyruvate dehydrogenase (PDH) complex (33); MiaB, which is likely a tRNA  
190 modification enzyme (34); as well as of course proteins that are directly involved in Fe-S synthesis,  
191 and the plastidic ferredoxin (Fd) that is an important electron donor that regulates several  
192 apicoplast-localized pathways (35–37). Dataset from a CRISPR-based genome-wide screen suggests  
193 that most of these candidates are important for fitness *in vitro* (38).

194 We first assessed whether depletion of TgSUFC led to a partial apicoplast loss, as was previously  
195 shown for TgNFS2 (12). Although slowed down in growth, some parasites eventually egressed during  
196 the course of the experiments and were used to reinvade host cells, and were kept for a total of 5  
197 days in the presence of ATc (Fig. 5A). This is reminiscent to the so-called “delayed death” effect,  
198 observed when inhibiting apicoplast metabolism, that often results in slow-kill kinetics (39).  
199 Quantification of the apicoplast marker TgCPN60 showed a progressive loss of this protein (Fig. 5A  
200 and B). As this could reflect a specific impact on this protein marker rather than a general loss of the  
201 organelle, we also stained the parasites with fluorescent streptavidin (mainly detects the biotinylated  
202 apicoplast protein acetyl-CoA carboxylase (40)), confirming a similar loss of signal after 5 days of  
203 incubation with ATc (Fig. S4). This suggests TgSUFC depletion leads to a progressive but late loss of  
204 the apicoplast. Of note, this effect on the organelle is less marked than when TgNFS2 is depleted  
205 (12).

206 One of the apicoplast-localized Fe-S proteins whose activity can be assessed is LipA, which is  
207 responsible for the lipoylation of a single apicoplast target protein, the E2 subunit of the PDH (41).  
208 We performed an immunoblot analysis with an anti-lipoic acid on protein extracts from cKD TgSUFC-  
209 HA parasites kept in the presence of ATc for up to 4 days (Fig. 5 C and D). We noticed a progressive  
210 decrease in lipoylated PDH-E2 to almost no signal after 3 days of ATc incubation. Using an antibody  
211 that we specifically raised against the E2 subunit of the PDH, we verified this was not due to a  
212 decrease in global levels of this particular protein. Overall, this is comparable to what we previously  
213 described upon depletion of TgNFS2 (12). Thus, disrupting the SUF pathway has direct consequences  
214 on Fe-S proteins-dependent metabolic pathways hosted by the apicoplast, and prolonged depletion  
215 of SUF proteins can even lead to partial loss of the organelle.

216

## 217 **Impact of SUF pathway disruption on fatty acid metabolism**

218 The PDH complex generates acetyl-CoA, which is the first step needed to fuel the FASII system in the  
219 apicoplast. This pathway generates fatty acid (FA) precursors that can be subsequently elongated in  
220 the endoplasmic reticulum (ER) (42, 43). These *de novo* synthesized FA from the apicoplast FASII can  
221 then be used as essential building blocks, to be combined with scavenged host FA, for bulk  
222 phospholipid synthesis to allow essential parasite membrane biogenesis (44, 45). We thus first  
223 wanted to evaluate the impact of the perturbation of the SUF pathway on parasite lipid content and  
224 homeostasis. Total lipid abundance from the TgNFS2 and TgSUFC mutant cell lines were determined  
225 and quantified by gas chromatography-mass spectrometry-based lipidomics analyses (GC-MS).  
226 Interestingly, for the TgNFS2 and TgSUFC mutants, there was a significant decrease in the abundance  
227 of shorter FAs (C12-C17) (Fig. 6A and D) that was not detected in the complemented strains (Fig. 6B  
228 and E). These shorter FA species are usually synthesized via the apicoplast FASII, suggesting that *de*  
229 *novo* FA synthesis could be affected in these mutants.

230 While FASII was shown previously to be critical for tachyzoite fitness (41), recent investigations have  
231 shown that tachyzoites are capable to sense and adapt their lipid synthetic/acquisition capacities  
232 according to the host nutrient content and/or lipid availability: for instance they are able upregulate  
233 their FASII activity if nutrients are scarce in the host, downregulate it if scavenged lipid levels are too  
234 high (45), and scavenge FA precursors from their host cells to at least partly compensate for a lack of  
235 *de novo* synthesis (44, 46). Thus, to investigate whether the SUF mutants have their lipid  
236 synthesis/flux affected, we sought to assess the impact of TgNFS2 and TgSUFC depletion on *de novo*-  
237 synthesized versus scavenged lipids by stable isotope precursor labeling with <sup>13</sup>C glucose combined  
238 with mass spectrometry-based lipidomic analyses (43–45). The analyses revealed a significant  
239 increase in the levels of host-scavenged lipids upon the disruption of TgSUFC (Fig. 6F). This was not  
240 observed in the complemented cell line (Fig. S5), and thus most likely reflects a mechanism for  
241 compensating the lack of *de novo*-made FAs by increasing scavenging host-derived FAs. On the other  
242 hand, this was not as obvious for the TgNFS2 mutant (Fig. 6C).

243 The ability of tachyzoites to survive lack of *de novo* lipid synthesis is highly dependent on the  
244 availability of exogenous lipid precursors. Others have shown that FASII mutants could be rescued by  
245 the addition of palmitic (C16:0) or myristic (C14:0) acid for instance (42, 46, 47). We thus tried to  
246 compensate the impact of TgNFS2 and TgSUFC depletion on the parasite lipid homeostasis by  
247 supplementing the growth medium with these FAs and performing plaque assays. Palmitic acid  
248 supplementation partially restored growth of the TgNFS2 mutant (Fig. 7A and B), while with myristic  
249 acid only after long term incubation (up to two weeks) these mutant parasites started growing back  
250 (Fig. 7C and D). In contrast, depletion of TgSUFC was not efficiently compensated by exogenous fatty  
251 acid supplementation (Fig. 7). Based on our lipid flux analysis, depletion of TgNFS2 affects the levels of  
252 short *de novo* FA content but mutant parasites are not capable to scavenge more FA from the host  
253 membrane lipids (Fig. 6A and C), it is thus possible that providing excess of free FA may help to  
254 compensate for this lack of FA and eventually improve fitness of the mutant parasites. On the other  
255 hand, TgSUFC mutant parasites do scavenge significantly more FA from the host lipids already (Fig.  
256 6F), and medium supplementation with more exogenous lipids does not seem to further improve  
257 their fitness.

258 This highlights differences between the two SUF pathway mutants with regards to adaptation to the  
259 perturbation of lipid homeostasis, which may be explained by different kinetics in depletion of the  
260 respective proteins, or a different impact on global apicoplast function. In any case, our data  
261 confirms apicoplast-based lipid production is affected in SUF pathway mutants, and while these  
262 parasites establish compensatory mechanisms by scavenging exogenous lipid precursors, they do not

263 allow them recovering to full fitness. This suggests that perturbation of apicoplast FA synthesis is not  
264 the only, and likely not even the primary, effect of SUF pathway disruption impacting growth.

265

## 266 **SUF pathway disruption also has an impact on isoprenoid-dependent pathways**

267 The other main apicoplast-localized biosynthetic pathway potentially affected by disruption of the  
268 SUF machinery is isoprenoid synthesis, through the two Fe-S-containing proteins IspG and IspH that  
269 are needed for the synthesis of the five carbon precursor isopentenyl pyrophosphate (IPP) and its  
270 isomer dimethylallyl pyrophosphate (DMAPP) (32). Synthesis of these isoprenoid building blocks is  
271 the only essential metabolic function of the apicoplast in the asexual intraerythrocytic stages of  
272 *Plasmodium*, where the loss of the organelle can be simply compensated by supplementation with  
273 exogenous IPP (48). *Plasmodium* SUF mutants survive when cultured in the presence of IPP,  
274 confirming the essential role of the Fe-S synthesizing pathway in this parasite is likely for isoprenoid  
275 synthesis (13). Isoprenoid synthesis is also vital for *T. gondii* tachyzoites (49), however IPP  
276 supplementation to the culture medium is not possible because, unlike for *Plasmodium*, the highly  
277 charged IPP does not efficiently reach the parasite cytoplasm. Tachyzoites can nevertheless scavenge  
278 some isoprenoids precursors from their host cells (50). Apicoplast-derived isoprenoid precursors are  
279 mostly known for their involvement in important posttranslational protein modifications like  
280 prenylation, glycosylphosphatidylinositol (GPI) anchoring, as well glycosylation, in addition to the  
281 synthesis of quinones and several antioxidant molecules (32).

282 In *Plasmodium* it is believed that prenylated proteins that regulate vesicle trafficking are key in the  
283 delayed death phenotype caused by apicoplast loss (51). As geranylgeraniol (GGOH), an isoprenoid  
284 precursor for protein farnesylation/prenylation, was successfully used to at least partially  
285 complement deficiencies in apicoplast isoprenoid production (50, 52), we tried to supplement the  
286 culture medium with GGOH and perform plaque assays with the SUF mutants we generated.  
287 However, we did not detect any restoration of growth (Fig. S6A). In contrast to *Plasmodium* (53, 54),  
288 the prenylome of *T. gondii* is still largely uncharacterized, but using an anti-farnesyl antibody, we did  
289 not detect obvious alterations in the general profile of prenylated proteins upon depletion of TgNFS2  
290 or TgSUFC (Fig. S6B). Although apicoplast-generated IPP and DMAPP are also necessary for  
291 synthesizing the farnesyl diphosphate used for protein prenylation in *T. gondii* tachyzoites, it is thus  
292 possible that these parasites can initially scavenge host-derived isoprenoids to compensate for a  
293 deficient *de novo* production (50). In any case, altogether our results suggest that defects in protein  
294 farnesylation/prenylation may not be one of the primary consequences of SUF pathway disruption in  
295 *T. gondii*.

296 We next sought to investigate the potential impact of TgNFS2 or TgSUFC depletion on GPI anchoring.  
297 The SAG-related sequence (SRS) family comprising proteins related to SAG1, the first characterized *T.*  
298 *gondii* surface antigen, is arguably the best characterized family of GPI-anchored proteins in the  
299 parasite (55). We pre-incubated mutant parasites for three days with ATc, and allowed them to  
300 invade and grow into host cells for an extra day in the presence of ATc before using specific  
301 antibodies to detect GPI-anchored SAG1 and SAG3. We could see obvious signs of mislocalization for  
302 these two proteins that, instead of keeping a homogenous peripheral distribution, they were often  
303 seen accumulated at the apex or base of the parasites, or found within the parasitophorous vacuole  
304 space (Fig. 8A and B). Interestingly, while the SAG1 protein appears to be distributed differently by  
305 IFA, our previous immunoblot analyses suggest there is no drastic change in the total amount of  
306 protein upon TgNFS2 or TgSUFC depletion ((12) and Fig. 2A). It was previously shown that the  
307 deletion of SAG1's GPI anchor leads to a constitutive secretion of this protein to the parasitophorous

308 vacuole space (56). It should be noted that, in contrast to the distribution of GPI-anchored SAG  
309 proteins, in these experimental conditions the overall structure of the IMC appeared unaffected (Fig.  
310 8A and B). Hence, our data suggest that disruption of the SUF pathway perturbs GPI anchor  
311 formation.

312 Another important posttranslational modification depending on isoprenoid-containing dolichol is  
313 glycosylation. Several key proteins of the glideosome complex are supposedly glycosylated, and as a  
314 consequence glycosylation inhibition has been reported to impact parasite motility (57, 58). We thus  
315 performed gliding motility assays on the SUF mutants. Typically, this is done by monitoring the  
316 shedding of SAG1, that leaves trails when tachyzoites glide on solid substrates. Perhaps as a  
317 consequence of SUF pathway disruption on SAG1 targeting, trails they were clearly less abundant  
318 upon depletion of TgNFS2 and TgSUFC (Fig. 8C and D). We could nevertheless detect and measure  
319 trails, whose mean length provides an estimate of overall motility rates, and they were found to be  
320 significantly smaller in absence of TgNFS2 or TgSUFC (Fig. 8E). These results suggest that protein  
321 glycosylation is also affected upon disruption of the SUF pathway. Overall, our findings indicate that  
322 the depletion of proteins of the SUF pathway leads to defects in the synthesis of isoprenoids  
323 precursors with consequences on the post-translational modification and targeting of proteins of the  
324 peripheral membrane system.

325

## 326 *Discussion*

327 Beside components of the SUF Fe-S cluster synthesis machinery, the apicoplast harbors only a small  
328 number of putative Fe-S proteins (Fig. 9, (12)). Yet, they are all presumably important for parasite  
329 fitness as suggested by their negative scores with a CRISPR-based genome-wide screen (Fig. 9, (38)).  
330 However, not all are expected to be absolutely essential *in vitro*. The tRNA modifying enzyme MiaB  
331 for instance, has only a moderately low fitness score and has been shown recently in to be  
332 dispensable for *Plasmodium* intraerythrocytic stages (37). Similarly, the LipA lipoyl synthase essential  
333 for the function of the E2 subunit of the PDH complex, which is in turn crucial for generating the  
334 acetyl-CoA necessary for de novo FA synthesis in the apicoplast, seems dispensable for *Plasmodium*  
335 blood stages (37), for which the FASII system is not essential in high nutrient-content medium (44,  
336 59). However, given the potentially greater importance of FASII in *T. gondii* tachyzoites (41), this is  
337 something we investigated further. We demonstrated disruption of the SUF pathway impaired LipA  
338 function and PDH-E2 lipoylation (Fig. 5) and, likely as a consequence of this and FASII perturbation,  
339 general production of myristic and palmitic acid in the parasites (Fig. 6). However, the growth defect  
340 of SUF mutants could only be partially complemented by FA supplementation for the TgNFS2 mutant,  
341 and not at all for the TgSUFC mutant (Fig. 7), suggesting perturbation of FASII is not the primary  
342 cause of death for these mutants. While it is undoubtedly a metabolic pathway that plays a central  
343 role for parasite fitness, the view on the essentiality of FASII in *T. gondii* tachyzoites has recently  
344 evolved. There is now published evidence that parasites can adapt their metabolic capacities  
345 depending on the nutrient environment (44, 45), and even survive *in vitro* when FASII enzymes are  
346 inactivated (46, 60). There is clearly flexibility in the adaptation of parasite pathways to lipid sources  
347 (44, 45, 61). As tachyzoites can readily scavenge and incorporate FAs from exogenous sources (i.e.  
348 phospholipid made by the host cell, and/or phospholipids and FA scavenged from the extracellular  
349 medium) into their own range of lipids (44–46, 62), in the end the essentiality of the FASII pathway  
350 depends largely on nutrient availability *in vivo*, or *in vitro* through culture conditions provided.

351 The other main metabolic pathway that depends directly on Fe-S proteins in the apicoplast is for the  
352 synthesis of isoprenoid precursors. When their isoprenoid production is inhibited, *T. gondii*



353 tachyzoites can scavenge some of these precursors from the host cell, leading to a delayed death  
354 effect (50, 63), but that cannot fully compensate for a lack of de novo synthesis. Isoprenoids are a  
355 large and diverse class of lipids whose cellular functions in Apicomplexa still remain to be extensively  
356 characterised, but they include synthesis of vitamins and cofactors (ubiquinone), and are also  
357 involved in important posttranslational modifications of proteins, like prenylation, GPI-anchoring and  
358 glycosylation (Fig. 9, (32)). Ubiquinone is a central molecule in the mitochondrial electron transport  
359 chain (ETC): its quinone head is the functional group for the transfer of electrons, whereas the  
360 isoprenoid tail primarily serves for anchoring to the inner mitochondrial membrane. The  
361 mitochondrial ETC is a validated drug target in Apicomplexa, for which complex III inhibitor  
362 atovaquone has been used in therapeutic strategies (64). However, while *T. gondii* mitochondrial ETC  
363 mutants are severely impaired in growth (65–68), it seems that genetic or pharmaceutical  
364 inactivation (with atovaquone) is reversible (12, 67), and may lead to stage conversion and a  
365 metabolic dormant state rather than complete death of the parasites. On the contrary, the viability  
366 of the SUF mutants is irreversibly affected (Fig. 3C and (12)). So although the impact SUF protein  
367 depletion on the isoprenoid pathway is likely to lead to a deficiency in ubiquinone synthesis, which in  
368 turn would contribute to a decrease in parasite fitness, this is probably not the main reason for the  
369 irreversible death of the parasites.

370 In *Plasmodium* blood stages, where isoprenoid synthesis is the only essential pathway hosted by the  
371 apicoplast, disrupting the prenylation of Rab GTPases, which are involved in vesicular trafficking,  
372 contributes to delayed death (51). In *T. gondii*, interestingly, perturbation of Rab function can lead to  
373 intracellular accumulation and patchy surface distribution of SAG1 proteins, and results in defects in  
374 the delivery of new membrane required for completing daughter cell segregation at the end of  
375 cytokinesis (69, 70). This bears some similarity with some phenotypes we have observed in the SUF  
376 mutants, yet while we cannot completely exclude Rab prenylation is perturbed in the SUF mutants,  
377 we did not identify any particular prenylation problem in the parasites, and we failed to complement  
378 their growth defect with prenylation precursor GGOH (Fig. S6). We thus investigated other important  
379 isoprenoid-dependent protein modifications. For instance, upon sugar addition dolichol can be used  
380 for the formation of GPI anchors, or act as a donor for protein glycosylation. Our phenotypic analysis  
381 revealed that the targeting of GPI-anchored surface proteins and the gliding motility of the parasites,  
382 which relies on glycosylated proteins, were clearly affected upon disruption of the SUF pathway (Fig.  
383 8). This confirms the importance of the apicoplast Fe-S cluster synthesis machinery for isoprenoid  
384 metabolism. In *Plasmodium*, interfering with apicoplast-hosted isoprenoid production affects the  
385 morphology of the organelle (71) but depletion of IspG and IspH does not lead to loss of the  
386 apicoplast (37), while interfering with the SUF pathway does (13). We also observe a late impact on  
387 the organelle (Fig. 5), that suggest the phenotypic consequences of SUF proteins in *T. gondii* are  
388 indeed multifactorial and would extend beyond the simple disruption of the isoprenoid pathway.

389 At the cellular level, one of the most visible consequence of long term depletion of SUF proteins is  
390 the membrane defects in the late stages of cytokinesis (Fig. 4). Interestingly, treatment of tachyzoites  
391 with the FASII inhibitor triclosan or inactivating the FASII component acyl carrier protein was shown  
392 to lead to severe problems in cytokinesis completion, with tethered daughter cells resembling the  
393 phenotype we have described here (47). A similar phenotype was also observed in the mutant for  
394 TgATS2, an apicoplast-located acyltransferase responsible for phosphatidic acid synthesis (44). This  
395 points to a central role for the apicoplast to provide specific precursors for membrane biogenesis  
396 during cytokinesis, and to a SUF-dependent FASII function is important for the homeostasis of the  
397 parasite plasma membrane. It should however be noted that some isoprenoid-dependent cellular  
398 mediators may also contribute to plasma membrane synthesis during cell division. For instance,  
399 disruption of Rab-controlled vesicular trafficking, leads to very similar phenotypes of incomplete

400 cytokinesis, with tachyzoites still fused along their lateral surface (69, 70). Glycosylated IMC proteins  
401 associated with gliding motility are also important for IMC formation and the cell division process  
402 (72). It is also possible that yet unidentified GPI-anchored *T. gondii* proteins may be involved in  
403 plasma membrane formation or recycling: GPI synthesis is essential for *T. gondii* survival (73), but the  
404 function of individual GPI-anchored proteins remain largely overlooked. The detrimental effects of  
405 SUF depletion on plasma membrane homeostasis may thus manifest through both FASII and  
406 isoprenoid perturbation. Moreover, as some isoprenoid-dependent modifications are also linked to  
407 FA acid synthesis, like GPI anchors of *T. gondii* surface proteins that also necessitate phospholipid  
408 moieties (74), a simultaneous impact on the two pathways may enhance the phenotypic output.

409 One key apicoplast-located Fe-S protein is Fd, which has a central role in the function of Fe-S-  
410 dependent apicoplast enzymes: it is potentially providing electrons to other apicoplast Fe-S enzymes  
411 like MiaB, IspG, IspH and LipA. The role of Fd has recently been investigated in Apicomplexa. In  
412 *Plasmodium* blood stage, the loss of parasite viability upon Fd depletion was likely mostly due to the  
413 importance of Fd for the isoprenoid synthesis pathway (37), which is the only essential apicoplast-  
414 located pathway in this developmental stage. Fd is equally essential for *T. gondii*, tachyzoite survival,  
415 where it was shown to impact both FASII and isoprenoid synthesis (35), in a similar fashion to our  
416 SUF mutants. Whether the vital importance of Fe-S cluster synthesis and associated apicoplast redox  
417 metabolism is solely through its key role in isoprenoid synthesis is thus less clear in *T. gondii* than in  
418 *Plasmodium*. As *T. gondii* tachyzoites grow in host cell types that can potentially provide them with  
419 more resources, the ability to scavenge exogenous metabolites creates a complex situation whereby  
420 metabolic pathways like FASII may be only essential in certain particular conditions. The nutrient-rich  
421 in vitro culture systems may also mask some important contributions. In any case, because of their  
422 upstream role in cellular functions important for parasite fitness, Fd and SUF mutants clearly have  
423 pleiotropic effects. More importantly, we have confirmed here that disrupting the SUF machinery  
424 leads to an irreversible death of the tachyzoites, which is not the case, for example, when the  
425 mitochondrial Fe-S cluster machinery is inactivated (12). For all these reasons, and also because of its  
426 absence from mammalian hosts of the parasite, the SUF pathway has a strong potential identifying  
427 novel drug targets.

428

#### 429 *Experimental procedures*

430 **Parasites and cells culture.** Tachyzoites of the TATI  $\Delta$ Ku80 *T. gondii* strain (25), as well as derived  
431 transgenic parasites generated in this study, were maintained by serial passage in monolayers of  
432 human foreskin fibroblast (HFF, American Type Culture Collection, CRL 1634) grown in Dulbecco's  
433 modified Eagle medium (Gibco), supplemented with 5% decomplexed fetal bovine serum, 2-mM  
434 L-glutamine and a cocktail of penicillin-streptomycin at 100  $\mu$ g/ml.

435

436 **Bioinformatic analyses.** Sequence alignment was performed using the MULTiple Sequence  
437 Comparison by Log-Expectation (MUSCLE) algorithm of the Geneious 6.1.8 software suite  
438 (<http://www.geneious.com>). Transit peptide and localization prediction was done with the Deeploc  
439 1.0 (<http://www.cbs.dtu.dk/services/DeepLoc-1.0/>) algorithm.

440

441 **Heterologous expression in *E. coli*.** Construct for designing the recombinant protein used for *E. coli*  
442 complementation was defined by aligning the amino acid sequences of TgSUF with its *E. coli*

443 counterparts. A 894 bp fragment corresponding to amino acids 220-518, was amplified by  
444 polymerase chain reaction (PCR) from *T. gondii* cDNA using primers ML4200/ML4010 (sequences of  
445 the primers used in this study are found in Table S1). The fragment was cloned into the pUC19  
446 plasmid (Thermo Fisher Scientific) using the HindIII/BamHI restriction sites. The SufC *E. coli* mutant  
447 from the Keio collection (obtained from the The *Coli* Genetic Stock Center at the University of Yale:  
448 stain number JW1672-1), was transformed with the plasmid expressing the TgSUFC recombinant  
449 protein and selected with ampicillin. For growth assays (22), overnight stationary phase cultures  
450 were adjusted to the same starting OD<sub>600</sub> of 0.6 in salt-supplemented M9 minimal media containing  
451 0.4% glucose and varying amounts of the 2,2'-Bipyridyl iron chelator (Sigma-Aldrich). Growth was  
452 monitored through OD<sub>600</sub> measurement after 7, 14 and 24 hours at 37°C in a shaking incubator.

453

#### 454 **Generation of the HA-tagged TgSUFC cell line.**

455 A CRISPR-based strategy was used. Using the pLIC-HA<sub>3</sub>-CAT plasmid as a template, a PCR was  
456 performed with the KOD DNA polymerase (Novagen) to amplify the tag and the resistance gene  
457 expression cassette with primers ML3980/ML3981, that also carry 30bp homology with the 3' end  
458 of the corresponding genes. A specific single-guide RNA (sgRNA) was generated to introduce a  
459 double-stranded break at the 3' of the *TgSUFC* gene, using primers ML3952/ML3953, and the  
460 protospacer sequences were introduced in the Cas9-expressing pU6-Universal plasmid (Addgene, ref  
461 #52694) (38). The TATi ΔKu80 cell line was transfected and transgenic parasites were selected with  
462 chloramphenicol and cloned by serial limiting dilution.

463 **Generation of TgSUFC conditional knock-down and complemented cell lines.** The conditional  
464 knock-down cell line for *TgSUFC* was generated based on the Tet-Off system using the  
465 DHFR-TetO7Sag4 plasmid (75) using a CRISPR-based strategy. Using the DHFR-TetO7Sag4 plasmid as  
466 a template, a PCR was performed with the KOD DNA polymerase (Novagen) to amplify the promoter  
467 and the resistance gene expression cassette with primers ML4107/ML4108 that also carry 30bp  
468 homology with the 5' end of the *TgSUFC* gene. A specific single-guide RNA (sgRNA) was generated to  
469 introduce a double-stranded break at the 5' of the *TgSUFC* locus. Primers used to generate the guide  
470 were ML4109/ML4110 and the protospacer sequences were introduced in the pU6-Universal  
471 plasmid (Addgene ref#52694) (38). The TgSUFC-HA cell line was transfected with the donor sequence  
472 and the Cas9/guide RNA-expressing plasmid and transgenic parasites were selected with  
473 pyrimethamine and cloned by serial limiting dilution.

474 The cKD TgSUFC-HA cell line was complemented by the addition of an extra copy of the *TgSUFC* gene  
475 put under the dependence of a tubulin promoter at the *uracil phosphoribosyltransferase* (*UPRT*)  
476 locus. *TgSUFC* (1,557 bp) whole cDNA sequence was amplified by reverse transcription (RT)-PCR with  
477 primers ML4815/ML4816. They were then cloned downstream of the *tubulin* promoter sequence of  
478 the pUPRT-TUB-Ty vector (25) to yield the pUPRT-TgSUFC plasmid. This plasmid was then linearized  
479 prior to transfection of the mutant cell line. The recombination efficiency was increased by co-  
480 transfecting with the Cas9-expressing pU6-UPRT plasmids generated by integrating *UPRT*-specific  
481 protospacer sequences (with primers ML2087/ML2088 for the 3' and primers ML3445/ML3446 for  
482 the 5') which were designed to allow a double-strand break at the *UPRT* locus. Transgenic parasites  
483 were selected using 5-fluorodeoxyuridine and cloned by serial limiting dilution to yield the cKD  
484 TgSUFC-HA comp cell line.

485

486 **Anti-TgPDH-E2 antibody production.** A polyclonal antibody was raised in rabbit against a peptide  
487 (ISLIQAKGLSLISASSSPA) specific of TgPDH-E2 by the Proteogenix company. The peptide was  
488 conjugated to Keyhole limpet haemocyanin carrier protein prior to immunization and the whole  
489 serum was affinity-purified against the peptide for increased specificity.

490

491 **Immunoblot analysis.** Protein extracts from  $10^7$  freshly egressed tachyzoites were prepared in  
492 Laemmli sample buffer, separated by SDS-PAGE and transferred onto nitrocellulose membrane using  
493 the BioRad Mini-Transblot system according to the manufacturer's instructions. Rat monoclonal  
494 antibody (clone 3F10, Roche) was used to detect HA-tagged proteins. Other primary antibodies used  
495 were mouse monoclonal anti-TY tag (27), rabbit anti-lipoic acid antibody (ab58724, Abcam), mouse  
496 anti-SAG1 (76), rabbit anti-CPN60 (77), mouse anti-actin (78), and rabbit anti-farnesyl polyclonal  
497 antibody (PA1-12554, Life Technologies).

498

499 **Immunofluorescence microscopy.** For immunofluorescence assays (IFA), intracellular tachyzoites  
500 grown on coverslips containing HFF monolayers, were either fixed for 20 min with 4% (w/v)  
501 paraformaldehyde in PBS and permeabilized for 10 min with 0.3% Triton X-100 in PBS or fixed for  
502 5 min in cold methanol (for SAG labelling). Slides/coverslips were subsequently blocked with 0.1%  
503 (w/v) BSA in PBS. Primary antibodies used (at 1/1,000, unless specified) were rat anti-HA tag (clone  
504 3F10, Roche), mouse anti-TY tag (27), rabbit anti-CPN60 (77), rabbit anti-IMC3 (79), mouse anti-SAG1  
505 (76), and mouse anti-SAG3 (80). Staining of DNA was performed on fixed cells by incubating them for  
506 5 min in a 1  $\mu\text{g/ml}$  4,6-diamidino-2-phenylindole (DAPI) solution. All images were acquired at the  
507 Montpellier RIO imaging facility from a Zeiss AXIO Imager Z2 epifluorescence microscope driven by  
508 the ZEN software v2.3 (Zeiss). Z-stack acquisition and maximal intensity projection was performed to  
509 quantify apicoplast loss. Adjustments for brightness and contrast were applied uniformly on the  
510 entire image.

511

512 **Electron Microscopy.** Parasites were pretreated for three days with ATc, and then used to infect HFF  
513 monolayers and grown for an extra 24 hours in ATc. They were fixed with 2.5% glutaraldehyde in  
514 cacodylate buffer 0.1 M pH7.4. Coverslips were then processed using a Pelco Biowave pro+ (Ted  
515 Pella). Briefly, samples were postfixated in 1%  $\text{OsO}_4$  and 2% uranyl acetate, dehydrated in acetonitrile  
516 series and embedded in Epon 118 using the following parameters: Glutaraldehyde (150 W  
517 ON/OFF/ON 1-min cycles); two buffer washes (40 s 150 W);  $\text{OsO}_4$  (150 W ON/OFF/ON/OFF/ON 1-min  
518 cycles); two water washes (40 s 150 W); uranyl acetate (100 W ON/OFF/ON 1-min cycles);  
519 dehydration (40 s 150 W); resin infiltration (350 W 3-min cycles). Fixation and infiltration steps were  
520 performed under vacuum. Polymerization was performed at 60°C for 48 hr. Ultrathin sections at  
521 70 nM were cut with a Leica UC7 ultramicrotome, counterstained with uranyl acetate and lead  
522 citrate and observed in a Jeol 1400+ transmission electron microscope from the MEA Montpellier  
523 Electron Microscopy Platform. All chemicals were from Electron Microscopy Sciences, and solvents  
524 were from Sigma.

525

526 **Plaque assay.** Confluent monolayers of HFFs were infected with freshly egressed parasites, which  
527 were left to grow for 7 days in the absence or presence of ATc (unless stated). For some  
528 experiments, the medium was supplemented with 50  $\mu\text{M}$  palmitic acid (P0500, Sigma-Aldrich), 50

529  $\mu\text{M}$  myristic acid (70082, Sigma-Aldrich), or 20  $\mu\text{M}$  geranylgeranyol (G3278, Sigma-Aldrich). They  
530 were then fixed with 4% v/v paraformaldehyde (PFA) and plaques were revealed by staining with a  
531 0.1% crystal violet solution (V5265, Sigma-Aldrich).

532

533 **Gliding assay.**  $10^7$  freshly egressed parasites were resuspended in 300  $\mu\text{l}$  of motility buffer (Ringer's  
534 solution: 155 mM NaCl, 3 mM KCl, 2 mM  $\text{CaCl}_2$ , 1 mM  $\text{MgCl}_2$ , 3 mM  $\text{NaH}_2\text{PO}_4$ , 10 mM HEPES, 10 mM  
535 glucose). 100  $\mu\text{l}$  were deposited on poly-L-lysine coated microscope slides (J2800AMNZ, Thermo  
536 Scientific), in a well delineated with a hydrophobic pen (PAP Pen, Kisker Biotech). Parasites were left  
537 to glide for 15 minutes in an incubator at 37°C, then the suspension was carefully removed and  
538 parasites were fixed with 4% (w/v) paraformaldehyde in PBS. Immunostaining was performed with  
539 an anti-SAG1 antibody (76) as described above, but without permeabilization. Trail deposition images  
540 were acquired with a 63x objective on a Zeiss AXIO Imager Z2 epifluorescence microscope and  
541 processed with ImageJ v. 1.53f51, using the NeuronJ plugin as described previously (35).

542

543 **Lipidomic analyses.** Parasite lipidomic analyses were conducted as previously described (44, 45).  
544 Briefly, the parasites were grown for 72 h in +/- ATc conditions within a confluent monolayer of HFF  
545 in flasks (175  $\text{cm}^2$ ). At each time point, parasites were harvested as intracellular tachyzoites ( $1 \times 10^7$   
546 cell equivalents per replicate) after syringe filtration with 3- $\mu\text{m}$  pore size membrane. These parasites  
547 were metabolically quenched by rapid chilling in a dry ice-ethanol slurry bath and then centrifuged  
548 down at 4°C. The parasite pellet was washed with ice-cold PBS thrice, before transferring the final  
549 pellet to a microcentrifuge tube. Then total lipids were extracted in chloroform/methanol/water  
550 (1:3:1, v/v/v) containing PC (C13:0/C13:0), 10 nmol and C21:0 (10 nmol) as internal standards for  
551 extraction. Polar and apolar metabolites were separated by phase partitioning by adding chloroform  
552 and water to give the ratio of chloroform/methanol/water as 2:1:0.8 (v/v/v). For lipid analysis, the  
553 organic phase was dried under  $\text{N}_2$  gas and dissolved in 1- $\mu\text{l}$  butanol/ $10^7$  parasites.

554 *Total lipid analysis* – The extracted total lipid sample was then added with 1 nmol pentadecanoic acid  
555 (C15:0) as internal standard as stated before using Trimethylsulfonium hydroxide for total FA  
556 content. Resultant FA methyl esters (FAMES) were analyzed by GC-MS as previously described (43).  
557 All FAMES were identified by comparison of retention time and mass spectra from GC-MS with  
558 authentic chemical standards. The concentration of FAMES was quantified after initial normalization  
559 to different internal standards and finally to parasite number.

560 Stable isotope metabolic labeling experiment.

561 *Tracking host-derived FAs – (monitoring parasite scavenging capacities)*

562 *Tracking host-derived fatty acids – (monitoring parasite scavenging capacities)* – Stable isotope  
563 metabolic labelling combined to lipidomic analyses have been conducted as previously established  
564 and described (45). Briefly, the HFF cells were grown ( $1 \times 10^8$  cell equivalents per replicate) to  
565 confluency in the presence of stable  $\text{U-}^{13}\text{C}$ -glucose isotope at a final concentration of 800  $\mu\text{M}$  added  
566 to a glucose-free DMEM. These  $^{13}\text{C}$ -pre labelled HFF were then infected with TgNFS2/TgSUFC cKD  
567 parasites in the presence of normal-glucose containing DMEM under +/-ATc (0.5  $\mu\text{g}/\text{ml}$ ). The host  
568 HFF and parasites were metabolically quenched separately, and their lipid content was quantified by  
569 GC-MS as described above. As described previously, the degree of the incorporation of  $^{13}\text{C}$  into fatty  
570 acids (%carbon incorporation) is determined by the mass isotopomer distribution (MID) of each

571 FAMES. The total abundance of <sup>13</sup>C-labelled fatty acids was analyzed initially for HFF to check  
572 labelling of the metabolites (described previously). Later, the same was calculated for parasites to  
573 confirm direct uptake of <sup>13</sup>C-labelled fatty acids from the host.

574

#### 575 *Data availability*

576 All data are contained within the manuscript. Material described is available upon request from the  
577 corresponding author.

578

#### 579 *Supporting information*

580 This article contains supporting information.

581

#### 582 *Acknowledgments*

583 We are grateful to B. Striepen, L. Sheiner, S. Lourido, D. Soldati-Favre, M.J. Gubbels, V. Carruthers,  
584 and J.F. Dubremetz for sharing antibodies, strains and plasmids. We wish to thank K. Semenovskaya  
585 for technical help with some constructs. We also thank the Montpellier Rio Imaging facility for  
586 providing access to their microscopes, as well as the electron microscopy imaging facility of the  
587 University of Montpellier.

588

#### 589 *Funding and additional information*

590 AC was supported by a fellowship from the Fondation pour la Recherche Médicale (Equipe FRM  
591 EQ20170336725), as well as CYB, CLV and YYB (Equipe FRM EQU202103012700). SB and CYB  
592 acknowledge support from the Labex Paraftrap (ANR-11-LABX-0024), the Agence Nationale de la  
593 Recherche (ANR-21-CE44-0010 to CYB and SB, and ANR-19-CE15-0023 to SB). Funding from the  
594 Région Auvergne Rhone-Alpes for the lipidomics analyses platform is also acknowledged (Grant IRICE  
595 Project GEMELI). The funders had no role in study design, data collection and analysis, decision to  
596 publish, or preparation of the manuscript.

597

#### 598 *Conflict of interest*

599 The authors declare that they have no conflicts of interest with the contents of this article.

600

601

#### 602 *References*

603

- 604 1. White, N. J., Pukrittayakamee, S., Hien, T. T., Faiz, M. A., Mokuolu, O. A., and Dondorp, A. M.  
605 (2014) Malaria. *Lancet*. **383**, 723–735
- 606 2. Sanchez, S. G., and Besteiro, S. (2021) The pathogenicity and virulence of *Toxoplasma gondii*.  
607 *Virulence*. **12**, 3095–3114

- 608 3. Janouskovec, J., Horak, A., Obornik, M., Lukes, J., and Keeling, P. J. (2010) A common red algal  
609 origin of the apicomplexan, dinoflagellate, and heterokont plastids. *Proceedings of the National*  
610 *Academy of Sciences*. **107**, 10949–10954
- 611 4. van Dooren, G. G., and Striepen, B. (2013) The algal past and parasite present of the apicoplast.  
612 *Annu. Rev. Microbiol.* **67**, 271–289
- 613 5. van Dooren, G. G., and Hapuarachchi, S. V. (2017) The dark side of the chloroplast: biogenesis,  
614 metabolism and membrane biology of the apicoplast. in *Advances in Botanical Research*, pp.  
615 145–185, Elsevier, **84**, 145–185
- 616 6. Seeber, F., and Soldati-Favre, D. (2010) Metabolic pathways in the apicoplast of apicomplexa. in  
617 *International Review of Cell and Molecular Biology*, pp. 161–228, **281**, 161–228
- 618 7. Biddau, M., and Sheiner, L. (2019) Targeting the apicoplast in malaria. *Biochem Soc Trans.* **47**,  
619 973–983
- 620 8. Imlay, J. A. (2006) Iron-sulphur clusters and the problem with oxygen. *Mol Microbiol.* **59**, 1073–  
621 1082
- 622 9. Lill, R. (2009) Function and biogenesis of iron–sulphur proteins. *Nature*. **460**, 831–838
- 623 10. Braymer, J. J., Freibert, S. A., Rakwalska-Bange, M., and Lill, R. (2021) Mechanistic concepts of  
624 iron-sulfur protein biogenesis in Biology. *Biochimica et Biophysica Acta (BBA) - Molecular Cell*  
625 *Research*. **1868**, 118863
- 626 11. Aw, Y. T. V., Seidi, A., Hayward, J. A., Lee, J., Victor Makota, F., Rug, M., and van Dooren, G. G.  
627 (2020) A key cytosolic iron-sulfur cluster synthesis protein localises to the mitochondrion of  
628 *Toxoplasma gondii*. *Mol Microbiol.* 10.1111/mmi.14651
- 629 12. Pamukcu, S., Cerutti, A., Bordat, Y., Hem, S., Rofidal, V., and Besteiro, S. (2021) Differential  
630 contribution of two organelles of endosymbiotic origin to iron-sulfur cluster synthesis and  
631 overall fitness in *Toxoplasma*. *PLoS Pathog.* **17**, e1010096
- 632 13. Gisselberg, J. E., Dellibovi-Ragheb, T. A., Matthews, K. A., Bosch, G., and Prigge, S. T. (2013) The  
633 Suf iron-sulfur cluster synthesis pathway is required for apicoplast maintenance in malaria  
634 parasites. *PLoS Pathog.* **9**, e1003655
- 635 14. Haussig, J. M., Matuschewski, K., and Kooij, T. W. A. (2014) Identification of vital and  
636 dispensable sulfur utilization factors in the *Plasmodium* apicoplast. *PLoS ONE*. **9**, e89718
- 637 15. Kumar, B., Chaubey, S., Shah, P., Tanveer, A., Charan, M., Siddiqi, M. I., and Habib, S. (2011)  
638 Interaction between sulphur mobilisation proteins SufB and SufC: Evidence for an iron–sulphur  
639 cluster biogenesis pathway in the apicoplast of *Plasmodium falciparum*. *International Journal*  
640 *for Parasitology*. **41**, 991–999
- 641 16. Charan, M., Singh, N., Kumar, B., Srivastava, K., Siddiqi, M. I., and Habib, S. (2014) Sulfur  
642 mobilization for Fe-S cluster assembly by the essential SUF pathway in the *Plasmodium*  
643 *falciparum* apicoplast and its inhibition. *Antimicrob. Agents Chemother.* **58**, 3389–3398
- 644 17. Charan, M., Choudhary, H. H., Singh, N., Sadik, M., Siddiqi, M. I., Mishra, S., and Habib, S. (2017)  
645 [Fe-S] cluster assembly in the apicoplast and its indispensability in mosquito stages of the  
646 malaria parasite. *FEBS J.* **284**, 2629–2648
- 647 18. Takahashi, Y., and Tokumoto, U. (2002) A third bacterial system for the assembly of Iron-Sulfur  
648 clusters with homologs in archaea and plastids. *J. Biol. Chem.* **277**, 28380–28383
- 649 19. Hirabayashi, K., Yuda, E., Tanaka, N., Katayama, S., Iwasaki, K., Matsumoto, T., Kurisu, G.,  
650 Outten, F. W., Fukuyama, K., Takahashi, Y., and Wada, K. (2015) Functional dynamics revealed  
651 by the structure of the SufBCD complex, a novel ATP-binding cassette (ABC) protein that serves  
652 as a scaffold for Iron-Sulfur cluster biogenesis. *Journal of Biological Chemistry*. **290**, 29717–  
653 29731
- 654 20. Harb, O. S., and Roos, D. S. (2020) ToxoDB: functional genomics resource for *Toxoplasma* and  
655 related organisms. *Methods Mol Biol.* **2071**, 27–47
- 656 21. Barylyuk, K., Koreny, L., Ke, H., Butterworth, S., Crook, O. M., Lassadi, I., Gupta, V., Tromer, E.,  
657 Mourier, T., Stevens, T. J., Breckels, L. M., Pain, A., Lilley, K. S., and Waller, R. F. (2020) A  
658 comprehensive subcellular atlas of the *Toxoplasma* proteome via hyperLOPIT provides spatial  
659 context for protein functions. *Cell Host & Microbe*. 10.1016/j.chom.2020.09.011

- 660 22. Outten, F. W., Djaman, O., and Storz, G. (2004) A suf operon requirement for Fe-S cluster  
661 assembly during iron starvation in Escherichia coli: suf operon role during iron starvation.  
662 *Molecular Microbiology*. **52**, 861–872
- 663 23. Fox, B. A., Ristuccia, J. G., Gigley, J. P., and Bzik, D. J. (2009) Efficient gene replacements in  
664 Toxoplasma gondii strains deficient for nonhomologous end joining. *Eukaryotic Cell*. **8**, 520–529
- 665 24. Huynh, M.-H., and Carruthers, V. B. (2009) Tagging of endogenous genes in a Toxoplasma  
666 gondii strain lacking Ku80. *Eukaryot Cell*. **8**, 530–539
- 667 25. Sheiner, L., Demerly, J. L., Poulsen, N., Beatty, W. L., Lucas, O., Behnke, M. S., White, M. W., and  
668 Striepen, B. (2011) A Systematic Screen to Discover and Analyze Apicoplast Proteins Identifies a  
669 Conserved and Essential Protein Import Factor. *PLoS Pathog*. 10.1371/journal.ppat.1002392
- 670 26. Meissner, M., Brecht, S., Bujard, H., and Soldati, D. (2001) Modulation of myosin A expression  
671 by a newly established tetracycline repressor-based inducible system in Toxoplasma gondii.  
672 *Nucleic Acids Res*. **29**, E115
- 673 27. Bastin, P., Bagherzadeh, A., Matthews, K. R., and Gull, K. (1996) A novel epitope tag system to  
674 study protein targeting and organelle biogenesis in Trypanosoma brucei. *Molecular and  
675 Biochemical Parasitology*. **77**, 235–239
- 676 28. Francia, M. E., and Striepen, B. (2014) Cell division in apicomplexan parasites. *Nat. Rev.  
677 Microbiol*. **12**, 125–136
- 678 29. Harding, C. R., and Meissner, M. (2014) The inner membrane complex through development of  
679 Toxoplasma gondii and Plasmodium. *Cell Microbiol*. **16**, 632–641
- 680 30. Ouologuem, D. T., and Roos, D. S. (2014) Dynamics of the Toxoplasma gondii inner membrane  
681 complex. *J Cell Sci*. **127**, 3320–3330
- 682 31. Gubbels, M.-J., Wieffer, M., and Striepen, B. (2004) Fluorescent protein tagging in Toxoplasma  
683 gondii: identification of a novel inner membrane complex component conserved among  
684 Apicomplexa. *Molecular and Biochemical Parasitology*. **137**, 99–110
- 685 32. Imlay, L., and Odom, A. R. (2014) Isoprenoid metabolism in apicomplexan parasites. *Curr Clin  
686 Microbiol Rep*. **1**, 37–50
- 687 33. Thomsen-Zieger, N., Schachtner, J., and Seeber, F. (2003) Apicomplexan parasites contain a  
688 single lipoic acid synthase located in the plastid. *FEBS Lett*. **547**, 80–86
- 689 34. Pierrel, F., Douki, T., Fontecave, M., and Atta, M. (2004) MiaB protein is a bifunctional radical-S-  
690 adenosylmethionine enzyme involved in thiolation and methylation of tRNA. *J Biol Chem*. **279**,  
691 47555–47563
- 692 35. Henkel, S., Frohnecke, N., Maus, D., McConville, M. J., Laue, M., Blume, M., and Seeber, F.  
693 (2022) Toxoplasma gondii apicoplast-resident ferredoxin is an essential electron transfer  
694 protein for the MEP isoprenoid-biosynthetic pathway. *J Biol Chem*. **298**, 101468
- 695 36. Frohnecke, N., Klein, S., and Seeber, F. (2015) Protein–protein interaction studies provide  
696 evidence for electron transfer from ferredoxin to lipoic acid synthase in *Toxoplasma gondii*.  
697 *FEBS Letters*. **589**, 31–36
- 698 37. Swift, R. P., Rajaram, K., Elahi, R., Liu, H. B., and Prigge, S. T. (2022) Roles of ferredoxin-  
699 dependent proteins in the apicoplast of Plasmodium falciparum parasites. *mBio*.  
700 10.1128/mbio.03023-21
- 701 38. Sidik, S. M., Huet, D., Ganesan, S. M., Huynh, M.-H., Wang, T., Nasamu, A. S., Thiru, P., Saeij, J.  
702 P. J., Carruthers, V. B., Niles, J. C., and Lourido, S. (2016) A Genome-wide CRISPR Screen in  
703 Toxoplasma Identifies Essential Apicomplexan Genes. *Cell*. **166**, 1423–1435.e12
- 704 39. Kennedy, K., Crisafulli, E. M., and Ralph, S. A. (2019) Delayed death by plastid inhibition in  
705 apicomplexan parasites. *Trends in Parasitology*. **35**, 747–759
- 706 40. Jelenska, J., Crawford, M. J., Harb, O. S., Zuther, E., Haselkorn, R., Roos, D. S., and Gornicki, P.  
707 (2001) Subcellular localization of acetyl-CoA carboxylase in the apicomplexan parasite  
708 Toxoplasma gondii. *Proceedings of the National Academy of Sciences*. **98**, 2723–2728
- 709 41. Mazumdar, J., H Wilson, E., Masek, K., A Hunter, C., and Striepen, B. (2006) Apicoplast fatty acid  
710 synthesis is essential for organelle biogenesis and parasite survival in Toxoplasma gondii. *Proc.  
711 Natl. Acad. Sci. U.S.A.* **103**, 13192–13197



- 712 42. Ramakrishnan, S., Docampo, M. D., Macrae, J. I., Pujol, F. M., Brooks, C. F., van Dooren, G. G.,  
713 Hiltunen, J. K., Kastaniotis, A. J., McConville, M. J., and Striepen, B. (2012) Apicoplast and  
714 endoplasmic reticulum cooperate in fatty acid biosynthesis in apicomplexan parasite  
715 *Toxoplasma gondii*. *J. Biol. Chem.* **287**, 4957–4971
- 716 43. Dubois, D., Fernandes, S., Amiar, S., Dass, S., Katris, N. J., Botté, C. Y., and Yamaro-Botté, Y.  
717 (2018) *Toxoplasma gondii* acetyl-CoA synthetase is involved in fatty acid elongation (of long  
718 fatty acid chains) during tachyzoite life stages. *J. Lipid Res.* **59**, 994–1004
- 719 44. Amiar, S., Katris, N. J., Berry, L., Dass, S., Duley, S., Arnold, C.-S., Shears, M. J., Brunet, C.,  
720 Touquet, B., McFadden, G. I., Yamaro-Botté, Y., and Botté, C. Y. (2020) Division and adaptation  
721 to host environment of apicomplexan parasites depend on apicoplast lipid metabolic plasticity  
722 and host organelle remodeling. *Cell Reports.* **30**, 3778–3792.e9
- 723 45. Dass, S., Shunmugam, S., Berry, L., Arnold, C.-S., Katris, N. J., Duley, S., Pierrel, F., Cesbron-  
724 Delauw, M.-F., Yamaro-Botté, Y., and Botté, C. Y. (2021) *Toxoplasma* LIPIN is essential in  
725 channeling host lipid fluxes through membrane biogenesis and lipid storage. *Nat Commun.* **12**,  
726 2813
- 727 46. Liang, X., Cui, J., Yang, X., Xia, N., Li, Y., Zhao, J., Gupta, N., and Shen, B. (2020) Acquisition of  
728 exogenous fatty acids renders apicoplast-based biosynthesis dispensable in tachyzoites of  
729 *Toxoplasma*. *J Biol Chem.* **295**, 7743–7752
- 730 47. Martins-Duarte, É. S., Carias, M., Vommaro, R., Surolia, N., and de Souza, W. (2016) Apicoplast  
731 fatty acid synthesis is essential for pellicle formation at the end of cytokinesis in *Toxoplasma*  
732 *gondii*. *J Cell Sci.* **129**, 3320–3331
- 733 48. Yeh, E., and DeRisi, J. L. (2011) Chemical rescue of malaria parasites lacking an apicoplast  
734 defines organelle function in blood-stage *Plasmodium falciparum*. *PLoS Biol.* **9**, e1001138
- 735 49. Nair, S. C., Brooks, C. F., Goodman, C. D., Sturm, A., Strurm, A., McFadden, G. I., Sundriyal, S.,  
736 Anglin, J. L., Song, Y., Moreno, S. N. J., and Striepen, B. (2011) Apicoplast isoprenoid precursor  
737 synthesis and the molecular basis of fosmidomycin resistance in *Toxoplasma gondii*. *J. Exp.*  
738 *Med.* **208**, 1547–1559
- 739 50. Li, Z.-H., Ramakrishnan, S., Striepen, B., and Moreno, S. N. J. (2013) *Toxoplasma gondii* relies on  
740 both host and parasite isoprenoids and can be rendered sensitive to Atorvastatin. *PLoS Pathog.*  
741 **9**, e1003665
- 742 51. Kennedy, K., Cobbald, S. A., Hanssen, E., Birnbaum, J., Spillman, N. J., McHugh, E., Brown, H.,  
743 Tilley, L., Spielmann, T., McConville, M. J., and Ralph, S. A. (2019) Delayed death in the malaria  
744 parasite *Plasmodium falciparum* is caused by disruption of prenylation-dependent intracellular  
745 trafficking. *PLoS Biol.* **17**, e3000376
- 746 52. Li, Z.-H., King, T. P., Ayong, L., Asady, B., Cai, X., Rahman, T., Vella, S. A., Coppens, I., Patel, S.,  
747 and Moreno, S. N. J. (2021) A plastid two-pore channel essential for inter-organelle  
748 communication and growth of *Toxoplasma gondii*. *Nat Commun.* **12**, 5802
- 749 53. Suazo, K. F., Schaber, C., Palsuledesai, C. C., Odom John, A. R., and Distefano, M. D. (2016)  
750 Global proteomic analysis of prenylated proteins in *Plasmodium falciparum* using an alkyne-  
751 modified isoprenoid analogue. *Sci Rep.* **6**, 38615
- 752 54. Gisselberg, J. E., Zhang, L., Elias, J. E., and Yeh, E. (2017) The prenylated proteome of  
753 *Plasmodium falciparum* reveals pathogen-specific prenylation activity and drug mechanism-of-  
754 action. *Mol Cell Proteomics.* **16**, S54–S64
- 755 55. Jung, C., Lee, C. Y.-F., and Grigg, M. E. (2004) The SRS superfamily of *Toxoplasma* surface  
756 proteins. *International Journal for Parasitology.* **34**, 285–296
- 757 56. Striepen, B., Yingxin He, C., Matrajt, M., Soldati, D., and Roos, D. S. (1998) Expression, selection,  
758 and organellar targeting of the green fluorescent protein in *Toxoplasma gondii*. *Molecular and*  
759 *Biochemical Parasitology.* **92**, 325–338
- 760 57. Fauquenoy, S., Morelle, W., Hovasse, A., Bednarczyk, A., Slomianny, C., Schaeffer, C., Van  
761 Dorsseleer, A., and Tomavo, S. (2008) Proteomics and glycomics analyses of N-glycosylated  
762 structures involved in *Toxoplasma gondii*-host cell interactions. *Molecular & Cellular*  
763 *Proteomics.* **7**, 891–910

- 764 58. Luk, F. C. Y., Johnson, T. M., and Beckers, C. J. (2008) N-linked glycosylation of proteins in the  
765 protozoan parasite *Toxoplasma gondii*. *Mol Biochem Parasitol.* **157**, 169–178
- 766 59. Vaughan, A. M., O’Neill, M. T., Tarun, A. S., Camargo, N., Phuong, T. M., Aly, A. S. I., Cowman, A.  
767 F., and Kappe, S. H. I. (2009) Type II fatty acid synthesis is essential only for malaria parasite late  
768 liver stage development. *Cellular Microbiology.* **11**, 506–520
- 769 60. Xu, X.-P., Elsheikha, H. M., Liu, W.-G., Zhang, Z.-W., Sun, L.-X., Liang, Q.-L., Song, M.-X., and Zhu,  
770 X.-Q. (2021) The role of type II fatty acid synthesis enzymes FabZ, ODSCI, and ODSCII in the  
771 pathogenesis of *Toxoplasma gondii* infection. *Front Microbiol.* **12**, 703059
- 772 61. Shunmugam, S., Arnold, C.-S., Dass, S., Katris, N. J., and Botté, C. Y. (2022) The flexibility of  
773 Apicomplexa parasites in lipid metabolism. *PLoS Pathog.* **18**, e1010313
- 774 62. Krishnan, A., Kloehn, J., Lunghi, M., Chiappino-Pepe, A., Waldman, B. S., Nicolas, D., Varesio, E.,  
775 Hehl, A., Lourido, S., Hatzimanikatis, V., and Soldati-Favre, D. (2020) Functional and  
776 computational genomics reveal unprecedented flexibility in stage-specific *Toxoplasma*  
777 metabolism. *Cell Host & Microbe.* 10.1016/j.chom.2020.01.002
- 778 63. Amberg-Johnson, K., and Yeh, E. (2019) Host cell metabolism contributes to delayed-death  
779 kinetics of apicoplast inhibitors in *Toxoplasma gondii*. *Antimicrob Agents Chemother.* **63**,  
780 e01646-18
- 781 64. Baggish, A. L., and Hill, D. R. (2002) Antiparasitic agent atovaquone. *Antimicrob Agents*  
782 *Chemother.* **46**, 1163–1173
- 783 65. Huet, D., Rajendran, E., van Dooren, G. G., and Lourido, S. (2018) Identification of cryptic  
784 subunits from an apicomplexan ATP synthase. *eLife.* **7**, e38097
- 785 66. Seidi, A., Muellner-Wong, L. S., Rajendran, E., Tjhin, E. T., Dagley, L. F., Aw, V. Y., Faou, P.,  
786 Webb, A. I., Tonkin, C. J., and van Dooren, G. G. (2018) Elucidating the mitochondrial proteome  
787 of *Toxoplasma gondii* reveals the presence of a divergent cytochrome c oxidase. *Elife.*  
788 10.7554/eLife.38131
- 789 67. Hayward, J. A., Rajendran, E., Zwahlen, S. M., Faou, P., and van Dooren, G. G. (2021) Divergent  
790 features of the coenzyme Q:cytochrome c oxidoreductase complex in *Toxoplasma gondii*  
791 parasites. *PLoS Pathog.* **17**, e1009211
- 792 68. Maclean, A. E., Bridges, H. R., Silva, M. F., Ding, S., Ovcariakova, J., Hirst, J., and Sheiner, L.  
793 (2021) Complexome profile of *Toxoplasma gondii* mitochondria identifies divergent subunits of  
794 respiratory chain complexes including new subunits of cytochrome bc1 complex. *PLoS Pathog.*  
795 **17**, e1009301
- 796 69. Agop-Nersesian, C., Naissant, B., Ben Rached, F., Rauch, M., Kretzschmar, A., Thiberge, S.,  
797 Menard, R., Ferguson, D. J. P., Meissner, M., and Langsley, G. (2009) Rab11A-controlled  
798 assembly of the inner membrane complex is required for completion of apicomplexan  
799 cytokinesis. *PLoS Pathog.* **5**, e1000270
- 800 70. Venugopal, K., Chehade, S., Werkmeister, E., Barois, N., Periz, J., Lafont, F., Tardieux, I., Khalife,  
801 J., Langsley, G., Meissner, M., and Marion, S. (2020) Rab11A regulates dense granule transport  
802 and secretion during *Toxoplasma gondii* invasion of host cells and parasite replication. *PLoS*  
803 *Pathog.* **16**, e1008106
- 804 71. Okada, M., Rajaram, K., Swift, R. P., Mixon, A., Maschek, J. A., Prigge, S. T., and Sigala, P. A.  
805 (2021) *Critical role for isoprenoids in apicoplast biogenesis by malaria parasites*, *Microbiology*,  
806 10.1101/2021.08.19.456988
- 807 72. Harding, C. R., Egarter, S., Gow, M., Jiménez-Ruiz, E., Ferguson, D. J. P., and Meissner, M. (2016)  
808 Gliding associated proteins play essential roles during the formation of the inner membrane  
809 complex of *Toxoplasma gondii*. *PLoS Pathog.* **12**, e1005403
- 810 73. Wichroski, M. J., and Ward, G. E. (2003) Biosynthesis of glycosylphosphatidylinositol is essential  
811 to the survival of the protozoan parasite *Toxoplasma gondii*. *Eukaryot Cell.* **2**, 1132–1136
- 812 74. Tomavo, S., Schwarz, R. T., and Dubremetz, J. F. (1989) Evidence for glycosyl-  
813 phosphatidylinositol anchoring of *Toxoplasma gondii* major surface antigens. *Mol. Cell. Biol.* **9**,  
814 4576–4580

- 815 75. Morlon-Guyot, J., Berry, L., Chen, C.-T., Gubbels, M.-J., Lebrun, M., and Daher, W. (2014) The  
816 *Toxoplasma gondii* calcium-dependent protein kinase 7 is involved in early steps of parasite  
817 division and is crucial for parasite survival. *Cell. Microbiol.* **16**, 95–114  
818 76. Couvreur, G., Sadak, A., Fortier, B., and Dubremetz, J. F. (1988) Surface antigens of *Toxoplasma*  
819 *gondii*. *Parasitology*. **97 ( Pt 1)**, 1–10  
820 77. Agrawal, S., van Dooren, G. G., Beatty, W. L., and Striepen, B. (2009) Genetic evidence that an  
821 endosymbiont-derived endoplasmic reticulum-associated protein degradation (ERAD) system  
822 functions in import of apicoplast proteins. *J. Biol. Chem.* **284**, 33683–33691  
823 78. Herm-Gotz, A. (2002) *Toxoplasma gondii* myosin A and its light chain: a fast, single-headed,  
824 plus-end-directed motor. *The EMBO Journal*. **21**, 2149–2158  
825 79. Anderson-White, B. R., Ivey, F. D., Cheng, K., Szatanek, T., Lorestani, A., Beckers, C. J., Ferguson,  
826 D. J. P., Sahoo, N., and Gubbels, M.-J. (2011) A family of intermediate filament-like proteins is  
827 sequentially assembled into the cytoskeleton of *Toxoplasma gondii*. *Cell. Microbiol.* **13**, 18–31  
828 80. Cesbron-Delauw, M. F., Tomavo, S., Beauchamps, P., Fourmaux, M. P., Camus, D., Capron, A.,  
829 and Dubremetz, J. F. (1994) Similarities between the primary structures of two distinct major  
830 surface proteins of *Toxoplasma gondii*. *J Biol Chem.* **269**, 16217–16222  
831

832

833

834

835

#### 836 *Abbreviations*

837 ABC (ATP-binding cassette), ATc (anhydrotetracycline), cKD (conditional knock-down), DMAPP  
838 (dimethylallyl diphosphate), DOXP (1-deoxy-D-xylulose 5-phosphate), ER (endoplasmic reticulum),  
839 ETC (electron transport chain), FA (fatty acid), FAME (fatty acid methyl ester), FASII (type II fatty acid  
840 synthase), FBS (fetal bovine serum), Fd (ferredoxin), Fe-S (iron-sulfur), GC-MS (gas chromatography-  
841 mass spectrometry), GGOH (geranylgeraniol), GPI (glycosylphosphatidylinositol), HA (hemagglutinin),  
842 HFF (human foreskin fibroblasts), IFA (immunofluorescence assay), IMC (inner membrane complex),  
843 IPP (isopentenyl diphosphate), ISC (iron-sulfur cluster), LipA (lipoic acid synthase A), LOPIT  
844 (localization of organelle proteins by isotope tagging), PDH (pyruvate dehydrogenase), surface  
845 antigen (SAG), SUF (sulfur utilization factor), TATi (tetracycline-inducible transactivator), UPRT (uracil  
846 phosphoribosyltransferase)

847

#### 848 *Figure legends*

849 **Figure 1. The *Toxoplasma gondii* functional homolog of SufC.** A) Schematic representation of the  
850 molecular machinery for Fe-S cluster synthesis in the apicoplast of *T. gondii*. B) Alignment of the  
851 predicted amino acid sequence of TgSUFc and its homolog from *Escherichia coli*. Motifs that are  
852 potentially important for ATPase activity are outlined in blue. C) Functional complementation of  
853 bacterial mutants for SufC. Growth of ‘wild-type’ (WT) *E. coli* K12 parental strain, the SufC mutant  
854 strain and the mutant strain complemented (‘comp’) by the *T. gondii* homolog, was assessed by  
855 monitoring the optical density at 600 nm in the presence or not of an iron chelator (2,2’-bipyridyl,  
856 ‘chel’). Values are mean from  $n = 3$  independent experiments  $\pm$ SEM. \* denotes  $p \leq 0.05$ , Student’s *t*-  
857 test, when comparing values obtained in the absence of chelator for the mutant cell line versus the  
858 complemented one.

859

860 **Figure 2. Generation of conditional knock-down and complemented cell lines for the apicoplast-**  
861 **localized TgSUFC.** A) Immunoblot analysis with anti-HA antibody shows precursor (p) and mature (m)  
862 forms of C-terminally HA-tagged TgSUFC and efficient down-regulation of the protein after 24 hours  
863 of incubation with ATc. Anti-SAG1 antibody was used as a loading control. B) HA-tagged TgSUFC  
864 (green) localizes to the apicoplast (labelled with marker TgCPN60, red) and is efficiently down-  
865 regulated upon addition of ATc for 24 hours. Scale bar represents 5  $\mu$ m. DNA was labelled with DAPI.  
866 Parasite shape is outlined. C) Immunoblot analysis of the conditional TgSUFC knock-down cell line  
867 expressing a TY-tagged version of the protein shows similar processing profile and stable expression  
868 after 48 hours of ATc addition. D) Immunofluorescence assay confirms co-localization of the  
869 regulatable HA-tagged TgSUFC (green) and the TY-tagged additional copy (red), whose expression is  
870 retained after 24 hours of incubation with ATc. Scale bar represents 5  $\mu$ m. DNA was labelled with  
871 DAPI. Parasite shape is outlined.

872

873 **Figure 3. Depletion of TgSUFC affects in vitro growth of the tachyzoites irreversibly.** A) Plaque  
874 assays were carried out by infecting HFF monolayers with the TgSUFC2-HA conditional knock-down  
875 and complemented cell lines. They were grown for 7 days  $\pm$  ATc. B) Measurements of lysis plaque  
876 areas highlight a significant defect in the lytic cycle when TgSUFC is depleted. Values are means of  $n =$   
877 3 experiments  $\pm$  SEM. Mean value of a TATi  $\Delta$ Ku80 control grown in the presence of Atc (not shown  
878 on the left) was set to 100% as a reference. \*\*\*\* denotes  $p \leq 0.0001$ , Student's *t*-test. Scale bar =  
879 2mm. C) Plaque assays for the TgSUFC mutant was performed as described in A), but ATc was  
880 washed out after 7 days (7d+ATc 7d-ATc) or not (14d+ATc), and parasites were left to grow for an  
881 extra 7 days. No plaque was observed upon Atc removal. Shown are images from one representative  
882 out of three independent experiments. Scale bar = 1mm. D) TgSUFC mutant and complemented cell  
883 lines, as well as their parental cell line and the TATi  $\Delta$ Ku80 control, were grown in HFF in the  
884 presence or absence of ATc for 48 hours, and subsequently allowed to invade and grow in new HFF  
885 cells for an extra 24 hours in the presence of ATc. Parasites per vacuole were then counted. Values  
886 are means  $\pm$  SEM from  $n = 3$  independent experiments for which 200 vacuoles were counted for each  
887 condition.

888

889 **Figure 4. Depletion of TgNFS2 or TgSUFC leads to membrane defects during cell division.** A) TgNFS2-  
890 HA and TgSUFC-HA conditional knock-down parasites as well as a TATi  $\Delta$ Ku80 control were grown in  
891 the presence of ATc for up to 2 days and were stained with an anti-TgIMC3 antibody (in red, to  
892 outline parasites and internal buds - top). Scale bar represents 5  $\mu$ m. DNA was labelled with DAPI  
893 (blue). B) The percentage of vacuoles presenting asynchronous division described in B) has been  
894 quantified and is represented as a means of  $n = 3$  experiments  $\pm$  SEM (bottom). \*\* denotes  $p \leq 0.01$ ,  
895 Student's *t*-test. C) Electron microscopy analysis of TgNFS2-HA and TgSUFC-HA conditional mutants  
896 grown for 4 days in the presence of ATc shows default in plasma membrane separation during  
897 parasite division, as displayed on insets representing magnifications of selected parts of the  
898 respective left image. D) cKD TgSUFC-HA parasites that were grown in the presence of ATc for 5 days  
899 were co-stained with anti-TgIMC3 to outline the inner membrane complex and anti-TgCPN60 (an  
900 apicoplast marker), which highlighted abnormal membrane structures and organelle segregation  
901 problems. Scale bar represents 5  $\mu$ m. DNA was labelled with DAPI.

902

903 **Figure 5. TgSUFC depletion impacts apicoplast-hosted Fe-S pathways.** A) cKD TgSUFC-HA parasites  
904 were kept in the presence of ATc for up to five days and the aspect of the apicoplast was evaluated  
905 by microscopic observation using the specific CPN60 marker. After 3 days, parasites egressed and  
906 were used to reinvade new host cells for subsequent timepoints. Scale bar represents 5  $\mu$ m. DNA was  
907 labelled with DAPI. DIC: differential interference contrast. B) Using the labelling described in A),  
908 apicoplast loss in vacuoles was monitored after two to five days of incubation with ATc. Data are  
909 mean values from  $n = 3$  independent experiments  $\pm$ SEM. ns, not significant; \*  $p \leq 0.05$ , \*\*\*\*  $p \leq$   
910 0.0001, Student's  $t$ -test. C) A decrease in the lipoylation of the E2 subunit of pyruvate dehydrogenase  
911 (TgPDH-E2), which depends on the apicoplast-hosted Fe-S-containing lipoyl synthase LipA, was  
912 observed by immunoblot using an anti-lipoic acid antibody on cell extracts from cKD TgSUFC-HA  
913 parasites kept with ATc for an increasing period of time. A polyclonal antibody raised against PDH-E2  
914 was used as a control for global abundance of the protein and for apicoplast integrity. TgACT1 was  
915 used as a loading control. D) Decrease of lipoylated TgPDH-E2 was quantified by band densitometry  
916 and normalized with the internal loading control. Data represented are mean  $\pm$ SEM of  $n = 3$   
917 independent experiments. ns, not significant, \*  $p \leq 0.05$ , \*\*  $p \leq 0.01$ , \*\*\*  $p \leq 0.001$ , \*\*\*\*  $p \leq 0.0001$ ,  
918 ANOVA comparison.

919

920 **Figure 6. Lipidomic analysis and lipid flux analysis upon TgNFS2 and TgSUFC depletion reveals**  
921 **changes in lipid homeostasis and fluxes.** Ratio +ATc/-ATc of total parasite lipid content for cKD  
922 TgNFS2-HA mutant (A) and its corresponding complemented cell line (B), and the cKD TgSUFC-HA  
923 mutant (D) and its corresponding complemented cell line (E). Host scavenged lipid flux analyses by  
924 stable isotope labelling combined to gas chromatography-mass spectrometry analyses on the TgNFS2  
925 (C) and TgSUFC (D) cKD mutants reveal a significant increase of host lipid scavenging upon TgSUFC  
926 depletion. All Data are mean from  $n=4$  (or  $n=3$  for panel D) independent experiments  $\pm$ SEM, \*  
927 corresponds to a  $p$ -value  $\leq 0.05$  using multiple Student's  $t$ -test.

928

929 **Figure 7. Exogenous supplementation with short chain fatty acids only partially restore fitness of**  
930 **cKD TgNFS2 and cKD TgSUFC mutant parasites *in vitro*.** Plaque assays were performed as described  
931 in Figure 3A, in the absence or presence of 50  $\mu$ M of palmitic (C16:0; A, B) or myristic (C14:0; C, D)  
932 acid. Plaque sizes were measured and area was expressed as a percentage of the value obtained  
933 after 7 days of growth in the absence of ATc. are mean values from  $n = 3$  independent experiments  
934  $\pm$ SEM. \*  $p \leq 0.05$ , \*\*  $p \leq 0.01$ , Student's  $t$ -test. Palmitic acid allows partial restoration of plaques with  
935 the cKD TgNFS2 mutant and to a lesser extent with the cKD TgSUFC mutant after 7 days of growth;  
936 myristic acid partially restored plaques but only for the cKD TgNFS2 mutant and after two weeks of  
937 incubation.

938

939 **Figure 8. The depletion of TgNFS2 or TgSUFC leads to mislocalization of GPI-anchored surface**  
940 **antigens and impacts gliding motility.** A) TgNFS2 and TgSUFC conditional mutants were grown for  
941 three days in the presence or absence of ATc and allowed to invade host cells for another 24 hours in  
942 the presence or absence of ATc. Parasites were then co-stained for inner membrane complex marker  
943 IMC3 (red) together with GPI-anchored protein SAG1 or SAG3 (green). As shown on insets  
944 representing selected parts of the images, the depletion of TgNFS2 or TgSUFC leads to the  
945 accumulation of SAGs in the vacuolar space (white arrowhead) or concentration at the apex or base  
946 of the parasite (red arrowhead). Scale bar represents 10  $\mu$ m. DNA was labelled with DAPI. B)  
947 Quantification of the abnormal distribution of SAG labellings in vacuoles containing more than two

948 parasites. Data are mean values from  $n = 3$  independent experiments  $\pm$ SEM. \*\*\*\*  $p \leq 0.0001$ ,  
949 Student's  $t$ -test. C) Representative views of a gliding assay showing lower abundance of SAG1 trails  
950 upon TgNFS2 or TgSUFC depletion (inverted grayscale images). Scale bar represents 10  $\mu$ m. D)  
951 Quantification of the trail to parasite ratio on at least ten randomly selected fields. Data are mean  
952 values from  $n = 3$  independent experiments  $\pm$ SEM. ns, not significant; \*  $p \leq 0.05$ , \*\*  $p \leq 0.01$ ,  
953 Student's  $t$ -test. E) Individual measurements of SAG1 trail lengths. Horizontal lines represent mean  
954 values from  $n = 3$  independent experiments  $\pm$ SEM. ns, not significant; \*\*\*\*  $p \leq 0.0001$ , Student's  $t$ -  
955 test.

956

957 **Figure 9. Schematic representation of the main cellular pathways that depend on apicoplast Fe-S**  
958 **proteins.** For selected apicoplast-located Fe-S proteins squared red numbers represent CRISPR  
959 fitness score of the corresponding gene (genes that contribute to *in vitro* parasite fitness are  
960 represented by negative scores; values below  $-2.5$  highlight increasing likelihood of being essential).  
961 Fd: ferredoxin; IspG/IspH: oxidoreductases catalysing the last two steps of IPP/DMAPP synthesis;  
962 LipA: lipoyl synthase; PDH-E2: E2 subunit of the pyruvate dehydrogenase complex; CoA: coenzyme A;  
963 IPP: isopentenyl diphosphate; DMAPP: dimethylallyl diphosphate; FASII: fatty acid synthesis type II;  
964 GPP: Geranyl diphosphate; FPP: farnesyl diphosphate; GGPP: Geranylgeranyl diphosphate; GPI:  
965 Glycosylphosphatidylinositol; dol-P: dolichol phosphate.

966

967 *Supporting Information*

968 This article contains supporting information (Figures S1-S6, Table S1)

**A**

## SUF pathway

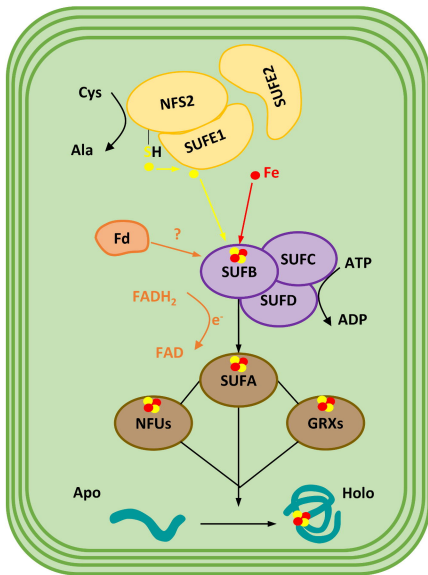**B**

|                    | 1                                                             | 10                                                        | 20               | 30         | 40      | 50     | 60  |
|--------------------|---------------------------------------------------------------|-----------------------------------------------------------|------------------|------------|---------|--------|-----|
| TgSUFCTGGT1_225800 | MASL                                                          | PVFLVELDRWKHHVWLRRRLRCLLVSPFVSLSVLPVLLPFLFNFTVSPDIVPSSALT |                  |            |         |        |     |
| EcSufC EGT68402    |                                                               |                                                           |                  |            |         |        |     |
|                    |                                                               | 70                                                        | 80               | 90         | 100     | 110    | 120 |
| TgSUFCTGGT1_225800 | LKSTSAFLSSPASRFSPPLSPLSCVSSRPSLSPSSSASSAPSSPSSASLGVRPHFISVPA  |                                                           |                  |            |         |        |     |
| EcSufC EGT68402    |                                                               |                                                           |                  |            |         |        |     |
|                    |                                                               | 130                                                       | 140              | 150        | 160     | 170    | 180 |
| TgSUFCTGGT1_225800 | ASGTELAASLSSTTSSFIGSSSSTRPALNRDSACRQTVSFPARLSPTLFLPSPDTEDEGRG |                                                           |                  |            |         |        |     |
| EcSufC EGT68402    |                                                               |                                                           |                  |            |         |        |     |
|                    |                                                               | 190                                                       | 200              | 210        | 220     | 230    | 240 |
| TgSUFCTGGT1_225800 | SFSDLQQLRDSREERFAALKSMREQETPRFQAEWDTPDQP                      | LIFEIKDTRVEAREEDGQETIKK                                   |                  |            |         |        |     |
| EcSufC EGT68402    |                                                               |                                                           |                  |            |         |        |     |
|                    |                                                               | 250                                                       | 260              | 270        | 280     | 290    | 300 |
| TgSUFCTGGT1_225800 | GVNITIMPGEVHALMGR                                             | NGSGKSTLTKV                                               | WAGYPSYKVFALG    | EVRYKGLD   | LEPI    | DNRGLA |     |
| EcSufC EGT68402    | GLSIAVRRPGEVHALMGR                                            | NGSGKSTLTKV                                               | WAGYPSYKVFALG    | EVRYKGLD   | LEPI    | DNRGLA |     |
|                    |                                                               | 310                                                       | 320              | 330        | 340     | 350    | 360 |
| TgSUFCTGGT1_225800 | GLRLDLYOYETIPEELVSNLE                                         | DFRRVAFNERRKKWKKKE                                        | PEVWVSYEREIVVEGR | LKEMVGLD   | DPSPFI  |        |     |
| EcSufC EGT68402    | GLRLDLYOYETIPEELVSNLE                                         | DFRRVAFNERRKKWKKKE                                        | PEVWVSYEREIVVEGR | LKEMVGLD   | DPSPFI  |        |     |
|                    |                                                               | 370                                                       | 380              | 390        | 400     | 410    | 420 |
| TgSUFCTGGT1_225800 | DRPLNYGSGSGPKKRN                                              | DFRQMLVANDPPEV                                            | MIDDTSCFVIG      | DSFNITANAI | KRFSKR  | KGKGS  |     |
| EcSufC EGT68402    | TRSMNVGSGSGPKKRN                                              | DFRQMLVANDPPEV                                            | MIDDTSCFVIG      | DSFNITANAI | KRFSKR  | KGKGS  |     |
|                    |                                                               | 430                                                       | 440              | 450        | 460     | 470    | 480 |
| TgSUFCTGGT1_225800 | HLVTLVHYKKLIVD                                                | LQPHKITHVMHACKIVL                                         | SGSMDHAGQI       | PAECGFQAI  | VGAAAEG | HEEER  |     |
| EcSufC EGT68402    | HLVTLVHYKKLIVD                                                | LQPHKITHVMHACKIVL                                         | SGSMDHAGQI       | PAECGFQAI  | VGAAAEG | HEEER  |     |
|                    |                                                               | 490                                                       | 500              | 510        | 518     |        |     |
| TgSUFCTGGT1_225800 | DRREDEGEREEHEGEDEAESLLSPSAAGGRRNLDRL                          |                                                           |                  |            |         |        |     |
| EcSufC EGT68402    |                                                               |                                                           |                  |            |         |        |     |

**C**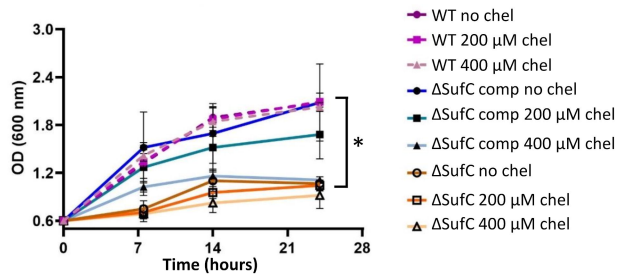

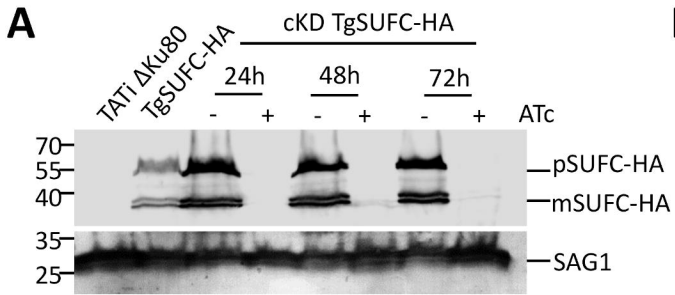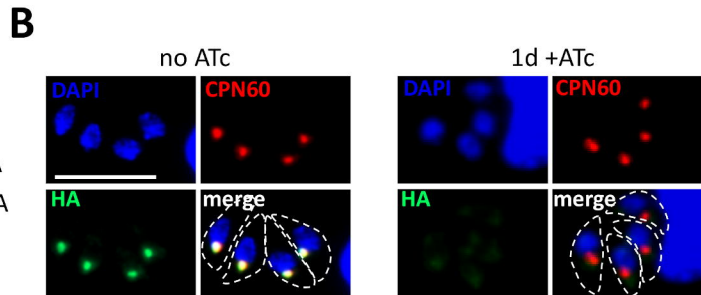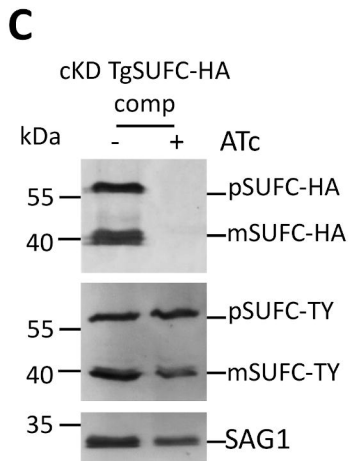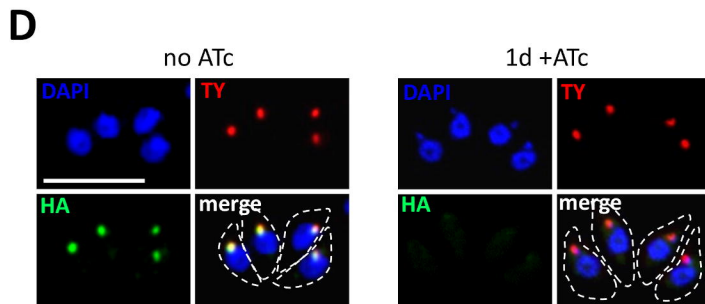



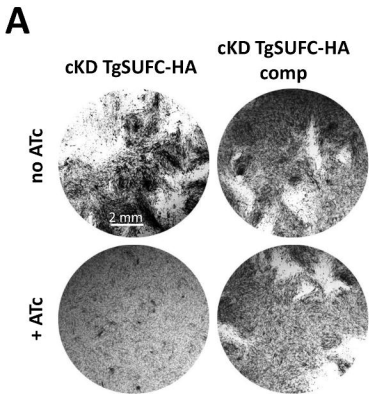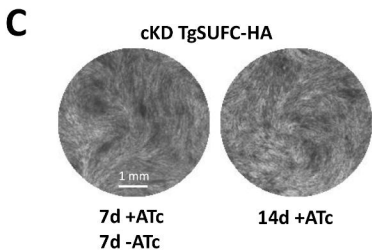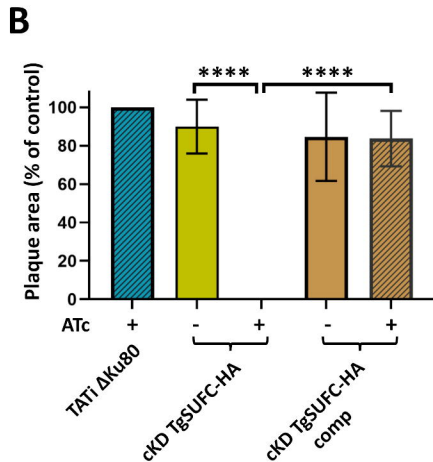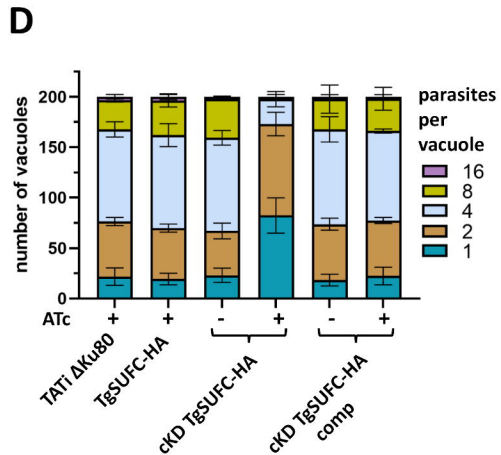

**A**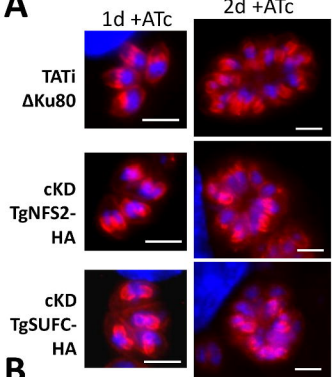**B**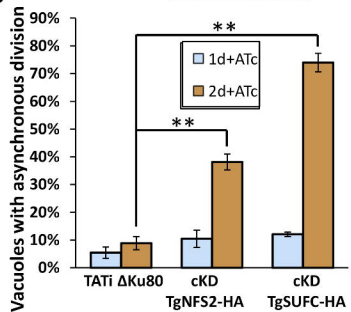**C**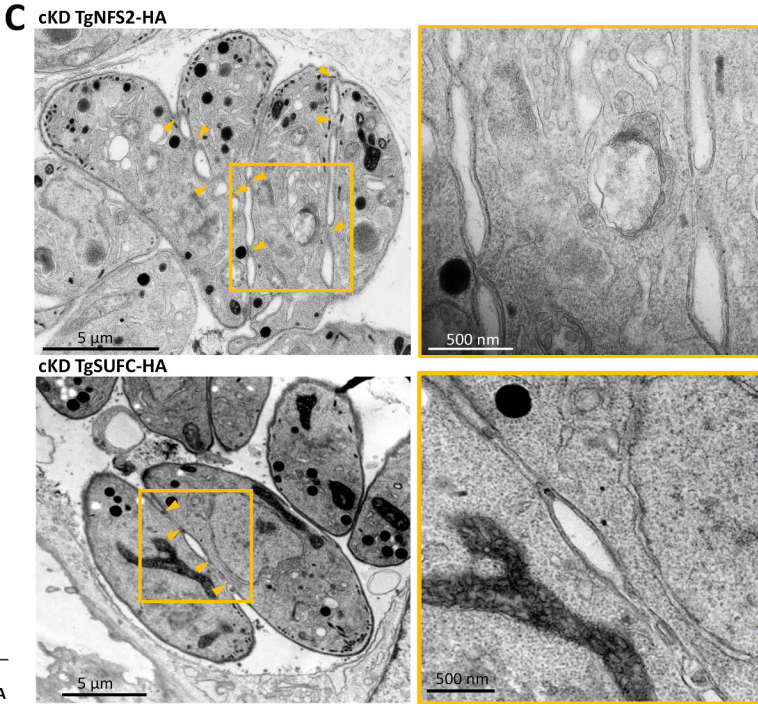**D**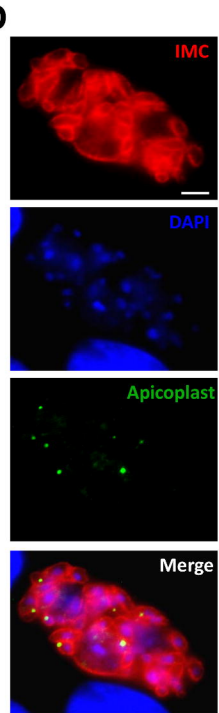

**A**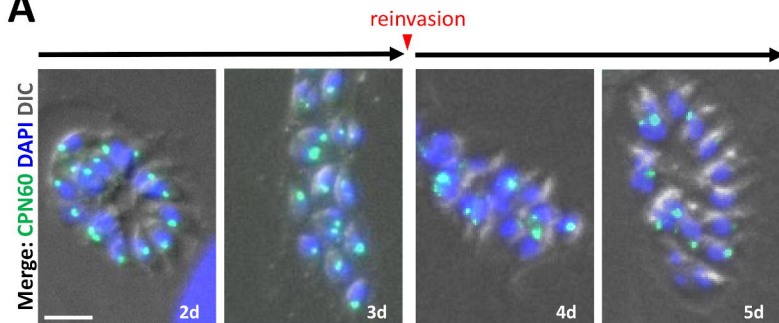**B**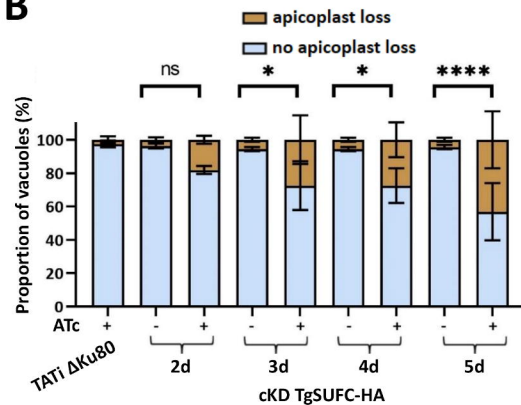**C**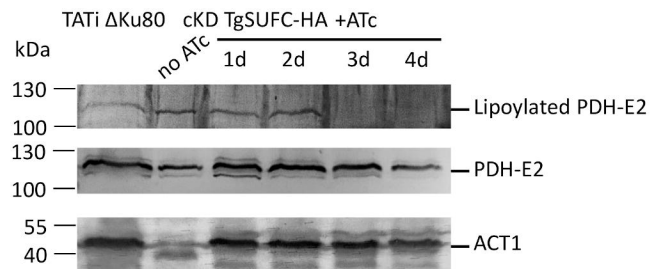**D**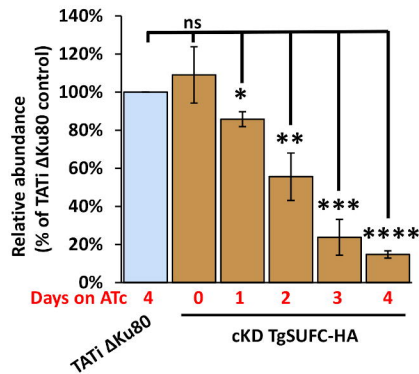

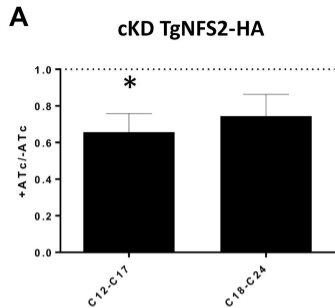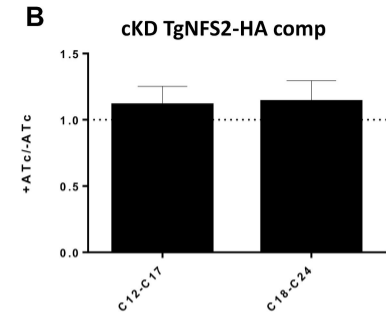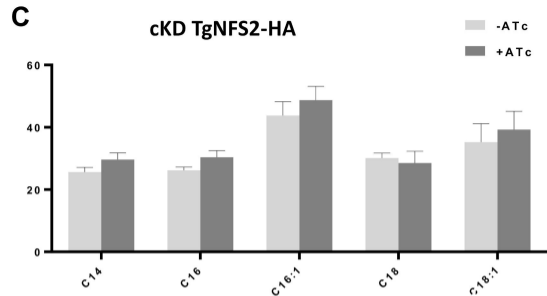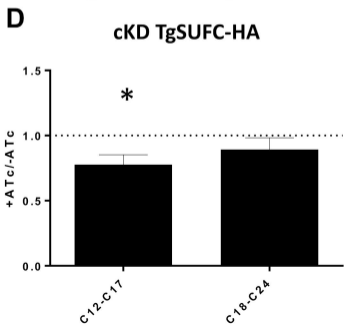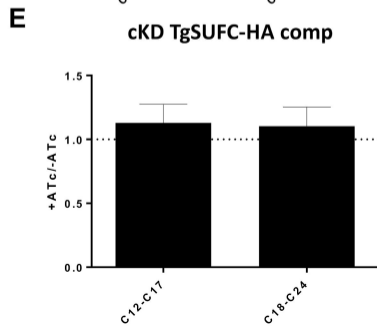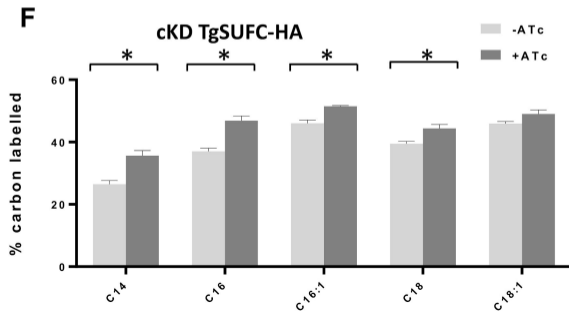

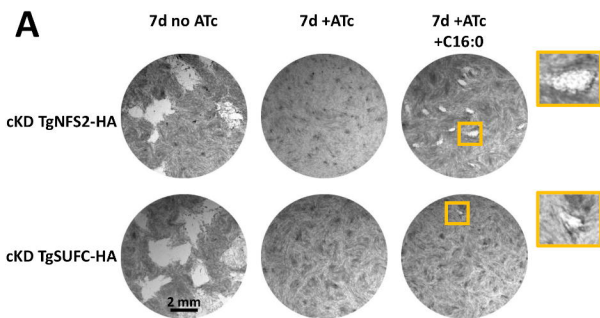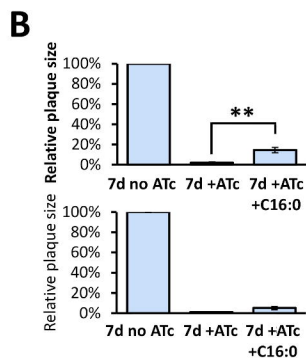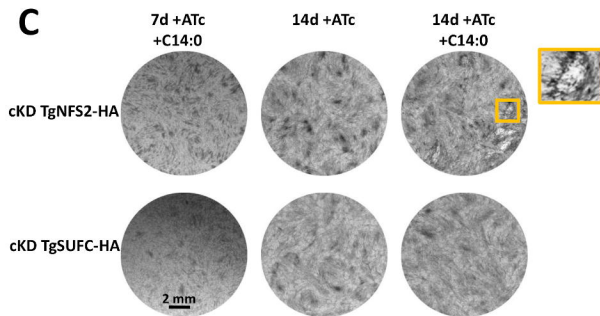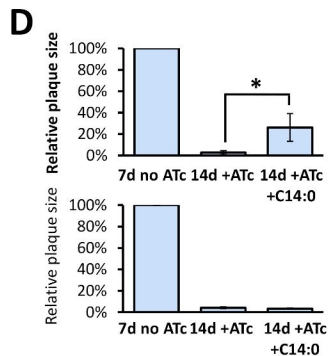

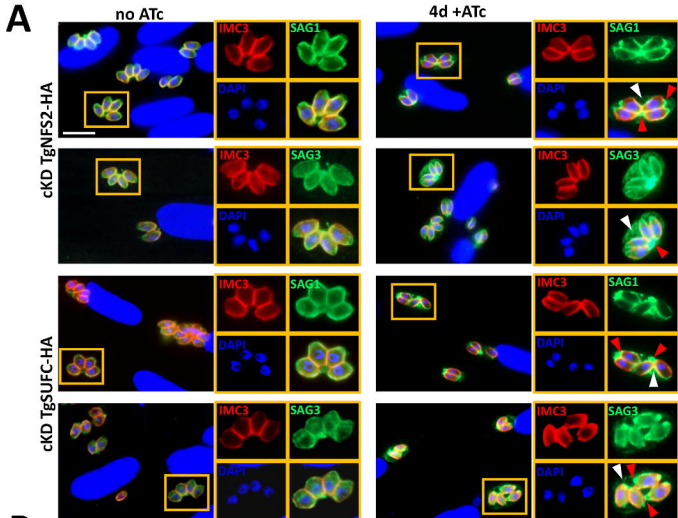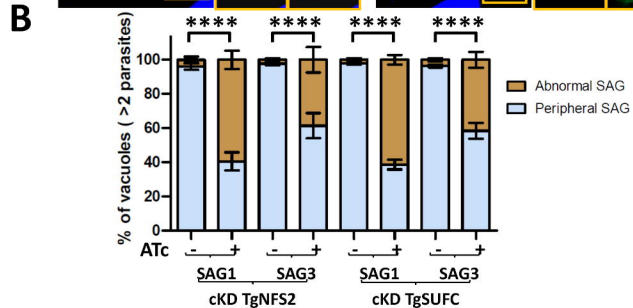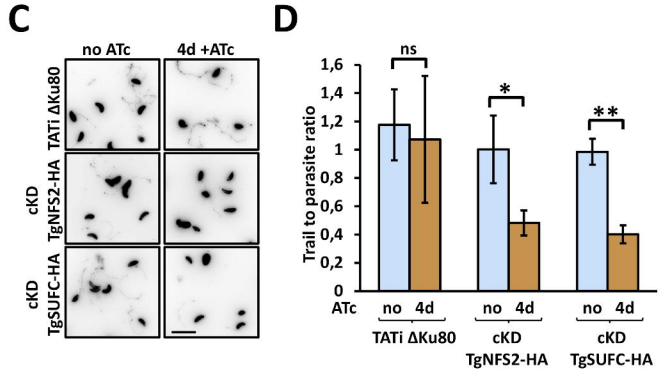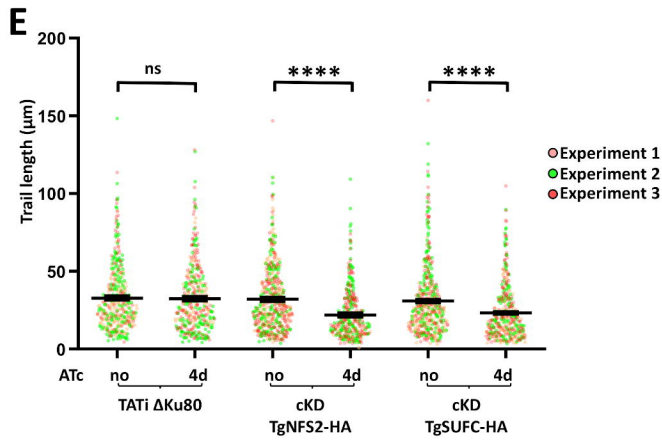

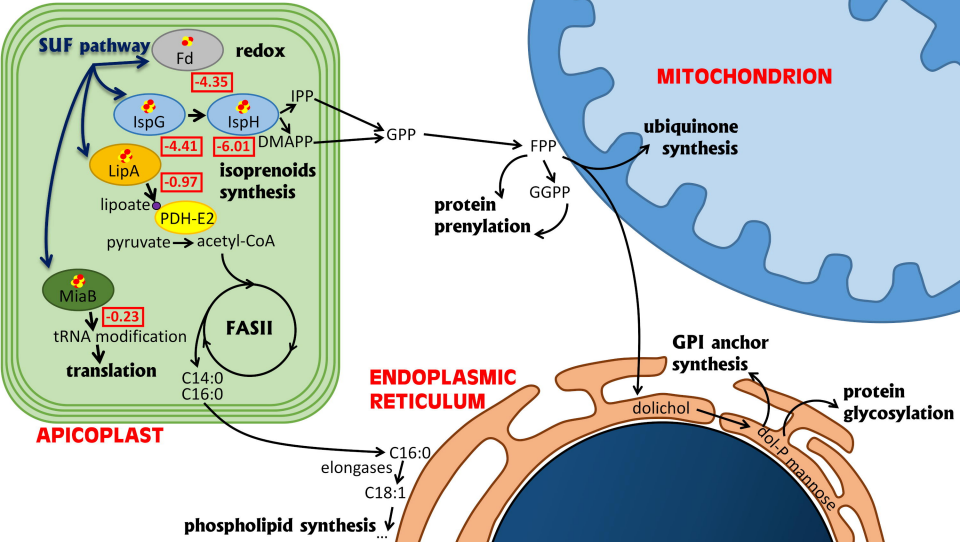

Source: https://www.biorxiv.org/content/10.1101/2022.03.18.484844v2.full.pdf
